# Supplementary material
Source: JCI journal article supplement (doi:10.1172/jci181885)
Supplement: sd1 [file 1]

1 **Supplementary Information for**  
2 **MSC transplantation ameliorates depression in lupus by suppressing Th1 cell-**  
3 **shaped synaptic stripping**

4

5 **This file includes:**

6       Supplementary Materials and Methods

7       Supplemental Figures, 1-11

8       Supplemental Tables, 1-6

## 9 **Supplementary Materials and Methods**

### 10 **Study approval and human subjects**

11 For individuals in the SLE group, the clinical diagnosis was assessed according to the  
12 American College of Rheumatology (ACR) revised SLE criteria (1) and the nomenclature and  
13 case definitions for NPSLE (2). Disease activity was measured with the SLEDAI (3). For healthy  
14 control subjects, the exclusion criteria included a history of neuropsychiatric disease, drug abuse,  
15 or head injury. Fluorochrome-labeled CD4<sup>+</sup>IFN- $\gamma$ <sup>+</sup> T cells and CD8<sup>+</sup>IFN- $\gamma$ <sup>+</sup> T cells among  
16 PBMCs were detected using a FACS Calibur flow cytometer (BD Biosciences), and the data  
17 were analyzed by FlowJo software (Tree Star). Human CD4<sup>+</sup> T cells were purified via magnetic  
18 cell sorting (Miltenyi Biotec), after which qPCR and immunoblotting were performed. Serum  
19 IFN- $\gamma$  levels were measured by ELISA. For the in vitro coculture study, naive human CD4<sup>+</sup> T  
20 cells were purified via an EasySep kit (STEMCELL Technologies). CSF was collected from 14  
21 patients with NPSLE and 9 SLE patients without NP manifestations (non-NP SLE patients). Six  
22 CSF samples from volunteers or epilepsy or encephalitis patients served as controls. Detailed  
23 information about the patients is provided in the Supplementary Information (Table S5).

### 24 **Isolation, culture and transplantation of hUCMSCs**

25 Ethical approval for this study was obtained from the Ethics Committee of the Affiliated  
26 Drum Tower Hospital of Nanjing University Medical School. Human umbilical cord (UC)  
27 samples were voluntarily donated by five individuals who delivered full-term infants via cesarean  
28 section. The UCs were collected and washed with ice-cold PBS. hUCMSCs were subsequently  
29 isolated and cultured in Dulbecco's modified Eagle's medium (DMEM)/F12 supplemented with  
30 10% fetal bovine serum (Gibco Life Technologies) and 1% penicillin/streptomycin at 37 °C in  
31 5% CO<sub>2</sub> as described previously (4, 5). When they reached 80% confluence, the adherent cells

32 were harvested and subcultured for amplification. To delineate the stromal characteristics of the  
33 harvested cells, the immunophenotype (CD29, CD73, CD90, CD105, CD14, CD45, CD31, and  
34 HLA-DR expression) was assessed as previously described (5). For cryopreservation, the  
35 identified hUCMSCs from all donors were combined and resuspended in a cryoprotectant  
36 solution composed of 90% FBS and 10% dimethyl sulfoxide (DMSO). In this study, hUCMSCs  
37 between passages 3 and 6 (P3 to P6) were used for the experiments and distributed to the  
38 recipient mice in equal proportions. To study the effects of MSCT, 5-week-old MRL/mpj and  
39 MRL/lpr mice and 12-week-old (4 weeks following pristane injection) C57BL/6J and  
40 *Syn1<sup>Cre</sup>;Ccl8<sup>fl/fl</sup>* mice were intravenously injected with hUCMSCs ( $5 \times 10^5$  in 500  $\mu$ l PBS) or the  
41 same volume of PBS (without hUCMSCs) as a control (6). Behavioral tests were performed 3  
42 weeks (MRL/lpr mice) or 6 weeks (pristane-induced lupus model) after MSCT. Brain tissues and  
43 sera were collected 24 hours after the behavioral tests.

#### 44 **Tissue collection and sample preparation**

45 The mice were anesthetized with 3% isoflurane and then transcardially perfused with ice-  
46 cold PBS. One hemisphere was dissected to isolate the prefrontal cortex, hippocampus,  
47 cerebellum, and midbrain. A fraction of each sample was used for RNA extraction. For the RNA-  
48 seq analysis, a fraction of the hippocampal samples was used.

#### 49 **In vitro Th1 cell differentiation and culture with MSCs**

50 Naive human CD4<sup>+</sup> T cells from PBMCs were purified using an EasySep kit (STEMCELL  
51 Technologies). Purified cells were cultured with plate-bound anti-CD3 (2.5  $\mu$ g/ml; eBioscience)  
52 and anti-CD28 (5  $\mu$ g/ml; eBioscience) for 5 days under Th1-polarizing conditions. For coculture  
53 analysis, sorted CD4<sup>+</sup> T cells were cultured with hUCMSCs in a Transwell system (0.4  $\mu$ m pore  
54 size, Millipore) at a ratio of 10:1 (T cells:MSCs) under Th1-polarizing conditions.

## 55 **Ex vivo isolation of microglia with microbeads**

56 Ex vivo microglial isolation was performed as previously reported (7). The mice were  
57 deeply anesthetized and intracardially perfused with ice-cold PBS. The brains were extracted,  
58 minced and enzymatically digested in DMEM/F12 containing 2% FBS, 20 U/ml DNase I  
59 (Sigma-Aldrich) and 0.5 mg/ml collagenase type IV (Sigma-Aldrich) at 37 °C for 1 h with  
60 shaking. After careful homogenization with 19-G needles, the homogenates were pushed through  
61 a 70- $\mu$ m strainer and then centrifuged at 500  $\times$  g for 10 min. The cell pellets were subsequently  
62 resuspended in 4 ml of a 37% Percoll solution (GE Healthcare). Next, the 70% Percoll (4 ml)  
63 solution containing the cells was transferred to a new 15 ml tube, and 4 ml of 37% Percoll was  
64 carefully overlaid on the layer containing cells, followed by a layer of 4 ml of 30% Percoll. The  
65 tube was centrifuged at 300  $\times$  g for 40 min at 18 °C without braking to remove myelin debris.  
66 Then, 2 ml of the 70%/37% interphase layer was collected, diluted with ice-cold PBS and  
67 subsequently centrifuged at 500  $\times$  g for 5 min at 4 °C. The pellets containing microglia were  
68 washed with PBS and then resuspended in MACS buffer. CD11b<sup>+</sup> microglia were isolated via  
69 manual MACS sorting (Miltenyi Biotec, 130-093-636) according to the manufacturer's  
70 instructions.

## 71 **RNA sequencing**

72 RNA sequencing of hippocampal tissue was performed as described in our previous study  
73 (8). Briefly, 3  $\mu$ g of RNA from each sample was used as input material for the RNA sample  
74 preparations, and mRNA was purified from total RNA using poly-T oligo-conjugated magnetic  
75 beads. The sequencing libraries were generated via the NEBNext® Ultra™ RNA Library Prep  
76 Kit for Illumina® (NEB, USA) according to the manufacturer's recommendations (Novogene  
77 Co., Ltd.). The sequencing reads were aligned to the mouse reference genome mm10

78 (GRCm38.90) via STAR aligner (v2.5.1b) guided by the mouse GENCODE gene model release  
79 v15. HTSeq v0.6.0 was used to count the read numbers mapped to each gene. The FPKM value  
80 of each gene was subsequently calculated, the raw count data were normalized, and differential  
81 expression analysis was subsequently performed. Differentially expressed genes (DEGs) were  
82 defined as those with at least a 1.5-fold change in expression and adjusted  $P < 0.05$  in  
83 comparisons of different genotypes.

84 RNA sequencing of isolated microglia was conducted as previously reported (9). Total RNA  
85 was extracted from microglia using TRIzol reagent (Thermo Fisher), and the mRNA was purified  
86 from the total RNA (5 mg) via Dynabeads Oligo (dT) (Thermo Fisher), fragmented into short  
87 fragments, and reverse transcribed to create cDNA templates using SuperScript™ II Reverse  
88 Transcriptase; these templates were subsequently used to synthesize the final cDNA libraries.  
89 Finally, 2×150-bp paired-end sequencing (PE150) was performed using the Illumina NovaSeq™  
90 6000 sequence platform (LC-Bio Technology Co., Ltd.) according to the vendor's recommended  
91 protocol. Reads obtained from the sequencing analyses were further filtered by Cutadapt and  
92 aligned to the murine reference genome using the HISAT2 package. DEGs were analyzed via  
93 DESeq2 software. Genes with a false discovery rate (FDR)  $< 0.05$  and an absolute fold change  $\geq$   
94 2 were considered DEGs. DEGs were then subjected to enrichment analyses of GO functions and  
95 KEGG pathways.

## 96 **Brain immunohistochemical and immunofluorescence staining**

97 As previously reported (8), the mice were deeply anesthetized and transcardially perfused  
98 with PBS, followed by perfusion with 4% paraformaldehyde (PFA) in PBS for fixation,  
99 postfixation in 4% PFA overnight, and cryoprotection in 20% sucrose. The brains were  
100 embedded in OTC and sectioned at a thickness of 25  $\mu\text{m}$  with a freezing microtome. The sections

101 were preserved in a cryoprotectant (50% glycerol and 50% PBS) and stored at -20 °C. For H&E  
102 staining, the brains were embedded in paraffin and sectioned at 15 µm. For fluorescence  
103 immunostaining, free-floating sections were rinsed with PBS, permeabilized with PBS containing  
104 0.3% Triton X-100 (PBST), blocked with blocking buffer (5% goat serum and 5% bovine serum  
105 albumin in PBST) at room temperature for 1 h, and incubated with primary antibodies overnight  
106 at 4 °C. After washing, the sections were incubated with secondary antibodies for 1 h at room  
107 temperature. The samples were then extensively washed and mounted in ProLong Diamond  
108 medium (Invitrogen, PK401). For immunochemical staining, endogenous peroxidases were  
109 neutralized (PBS/3% H<sub>2</sub>O<sub>2</sub>), and nonspecific binding was blocked. Then, the sections were  
110 stained with primary and secondary antibodies and visualized via 3'-diaminobenzidine  
111 immunostaining. The primary and secondary antibodies used in this study are listed in the  
112 Supplementary Information, Table S4. For neuron quantification, the sections were stained with  
113 Nissl staining solution (0.05% thionine/0.08 M acetate buffer, pH 4.5).

#### 114 **Golgi staining**

115 For dendritic spine quantification, the sections were stained with an FD Rapid Golgi Stain  
116 Kit (FD NeuroTechnologies, PK401) according to the manufacturer's instructions. Golgi-stained  
117 neurons and dendritic segments from the cortex and hippocampus were imaged under a  
118 microscope (FV3000 Microscope, Olympus) with a 100 × objective. Dendritic branching and  
119 spines were analyzed via NIH ImageJ software.

#### 120 **Fluorescence in situ hybridization (FISH)**

121 Fluorescent in situ hybridization (FISH) was performed on 8-µm-thick hippocampal sections  
122 from the formalin-fixed paraffin-embedded brain as previously described (10, 11). The sections  
123 were deparaffinized and then processed to detect the mRNA level and cell type specificity of

124 *Ccl8* and *Eno2* in the mouse models of lupus according to the manufacturer's standard protocol  
125 (Gene Pharma). The sections were digested with proteinase K and heated to 78 °C for 8 min for  
126 denaturation. The RNA probes were incubated overnight at 37 °C with hybridization buffer  
127 containing 2 μM of a commercially available CY3-labeled CCL8 probe and 2 μM of a  
128 commercially available FAM-labeled *Eno2* probe. Finally, the sections were washed with PBS  
129 and mounted with ProLong Gold anti-fade reagent containing DAPI. Images of  
130 immunofluorescence staining were captured via a Zeiss LSM710 confocal microscope (Carl  
131 Zeiss Co.). The mouse *Ccl8* probe sequence, which was labeled with CY3 at the 5' end, was 5'-  
132 AGCCTTATCTGGCCCAGTCAGCTTCTC-3'. The 5' FAM-labeled mouse *Eno2* probe  
133 sequence was 5'-CACCGTCAGGTCATCGCCCACTATCT-3'. These probes were synthesized  
134 by GenePharma.

### 135 **Quantitative RT-PCR**

136 Real-time PCR was performed as described in our previous study using StepOnePlus Real-  
137 Time PCR Systems (Applied Biosystems) (8). Total RNA was extracted from tissues or cells  
138 using Trizol reagent (Vazyme Biotech, R401-01) according to the manufacturer's instructions.  
139 The RNA concentrations were adjusted to 1.0 μg/μl in nuclease-free water. For cDNA synthesis,  
140 reverse transcription was performed using a HiScript III RT SuperMix for qPCR Kit (Vazyme,  
141 R323-01). Next, the cDNAs were amplified and quantified using ChamQ SYBR qPCR Master  
142 Mix (Vazyme, Q341-02). *GAPDH* was used as an internal control. The sequences of the primers  
143 used for qPCR in this study (GenScript Biotech) are listed in Supplementary Table 3.

### 144 **Enzyme-linked immunosorbent assay (ELISA)**

145 The cell culture supernatant was collected and centrifuged at 1000 × g for 10 min at 4 °C.  
146 The supernatants were carefully collected and stored at -80 °C until assayed. Hippocampal tissues

147 (100 mg) were rinsed and homogenized in PBS (1 ml) before being stored overnight at -80 °C.  
148 After the cell membranes were disrupted by two freeze-thaw cycles, the homogenates were  
149 centrifuged at  $5000 \times g$  for 5 min at 4 °C, and the supernatants were collected (9). Human serum  
150 and CSF samples were collected, aliquoted, and stored at -80 °C until further analysis. The levels  
151 of anti-double-stranded DNA antibody (anti-dsDNA Ab) and cytokines (IFN- $\gamma$  and/or CCL8) in  
152 the cell culture supernatant, serum, CSF or hippocampal extracts were measured using  
153 commercially available ELISA kits according to the manufacturers' instructions.

#### 154 **Mouse behavioral testing**

155 **Sucrose preference test (SPT)** As previously described (9, 12, 13), the animals were first trained  
156 to consume a 1% w/v sucrose solution for 3 days from two different bottles. Twenty-four hours  
157 later, the animals were allowed free access to 1% w/v sucrose solution and tap water from two  
158 different bottles. The locations of the bottles (left or right) were switched across the study area to  
159 avoid a preference on the basis of the location of the bottles. Tap water and sucrose solution  
160 intake were measured after 24 hours by subtracting the final weight of the bottles from their  
161 initial weight. The preference for sucrose was then calculated as a percent preference = sucrose  
162 consumption/(sucrose + water consumption)  $\times$  100%. The tests were performed by an individual  
163 who was blinded to the animal's treatment status.

164 **Forced swim test (FST)** This procedure is used to induce a despair-like state and to test the  
165 effects of antidepressants on mice. The FST was performed as previously described, with slight  
166 modifications (12, 14). The mice were placed in a transparent glass cylinder (height, 35 cm;  
167 diameter, 17 cm) filled with water (23-25 °C) to a depth of 25 cm. The water depth was adjusted  
168 such that the animals had to swim or float without their hind limbs or tail touching the bottom.  
169 During testing (6-min trial), the duration of immobility (the time during which the subject made

170 only small movements necessary to keep their heads above water) within the final 4 min of the 6-  
171 min test was recorded using a video tracking system (TopScan software, CleverSys, Inc.). Each  
172 mouse was immediately removed from the cylinder and excluded from the study if it failed to  
173 swim or failed to keep its head above the water. After every trial, the water was changed, and the  
174 cylinder was rinsed with clean water.

175 **Tail-suspension test (TST)** This procedure is an alternative to the FST used to assess  
176 depression-like behavior. At the beginning of a trial, the mice were suspended by the tail (taped  
177 onto a suspension hook such that the animal would hang with its tail in a straight line) 50 cm  
178 above a flat surface. During testing (6-min trial), the duration of immobility (hanging passively  
179 without body movement) during the last 4 min of the 6-min test was monitored using a video  
180 tracking system and scored automatically (TopScan software, CleverSys, Inc.).

181 **Open field** The mouse open field chambers were made of Plexiglas and consisted of a square  
182 base (40 × 40 × 30 cm). For each test session, the mouse was allowed to explore the environment  
183 freely for 6 min. A computer-assisted video-tracking system (TopScan software, CleverSys, Inc.)  
184 was used to record the movement. The total distance traveled (cm) and the mean velocity (mm/s)  
185 during the test were used as measurements of general locomotor activity.

#### 186 **Assessment of lupus**

187 Lupus was monitored by detecting albuminuria and autoantibody titers during the  
188 experiment, as described in our previous reports (8, 15). Urinary protein excretion was measured  
189 via a Bradford protein detection kit (Keygen Biotech, KGA801-804). Serum anti-dsDNA IgG  
190 titers were measured via ELISA (FUJIFILM, 631-02699) according to the manufacturer's  
191 instructions.

192 **References**

- 193 1. Hochberg, M.C. Updating the American College of Rheumatology revised criteria for the  
194 classification of systemic lupus erythematosus. *Arthritis & Rheumatism*. 1997;40(9):1725.
- 195 2. The American College of Rheumatology nomenclature and case definitions for neuropsychiatric  
196 lupus syndromes. *Arthritis & Rheumatism*. 1999;42(4):599-608.
- 197 3. Bombardier, C., et al. Derivation of the sledai. A disease activity index for lupus patients. *Arthritis*  
198 *& Rheumatism*. 1992;35(6):630-640.
- 199 4. Lei Q, et al. Extracellular vesicles deposit PCNA to rejuvenate aged bone marrow-derived  
200 mesenchymal stem cells and slow age-related degeneration. *Sci Transl Med*. 2021;13(578):eaaz8697.
- 201 5. Zhang, Z., et al. Human umbilical cord mesenchymal stem cells inhibit T follicular helper cell  
202 expansion through the activation of iNOS in lupus-prone B6.MRL-Faslpr mice. *Cell Transplant*.  
203 2017;26(6):1031-1042.
- 204 6. Li, W., et al. Mesenchymal stem cells prevent overwhelming inflammation and reduce infection  
205 severity via recruiting CXCR3<sup>+</sup> regulatory T cells. *Clin Transl Immunology*. 2020;9(10):e1181.
- 206 7. Garber, C., et al. Astrocytes decrease adult neurogenesis during virus-induced memory  
207 dysfunction via IL-1. *Nat Immunol*. 2018;19(2):151-161.
- 208 8. Han X, et al. Neuronal NR4A1 deficiency drives complement-coordinated synaptic stripping by  
209 microglia in a mouse model of lupus. *Signal Transduct Target Ther*. 2022;7(1):50.
- 210 9. Zhang Y, et al. CircDYM ameliorates depressive-like behavior by targeting miR-9 to regulate  
211 microglial activation via HSP90 ubiquitination. *Mol Psychiatr*. 2020;25(6):1175-1190.
- 212 10. Lehrman, E.K., et al. CD47 protects synapses from excess microglia-mediated pruning during  
213 development. *Neuron*. 2018;100(1):120-134.
- 214 11. Di Liberto G, et al. Neurons under T cell attack coordinate phagocyte-mediated synaptic stripping.  
215 *Cell*. 2018;175(2):458-471.
- 216 12. Leng, L., et al. Menin deficiency leads to depressive-like behaviors in mice by modulating  
217 astrocyte-mediated neuroinflammation. *Neuron*. 2018;100(3):551-563.

- 218 13. Willner, P., et al. Reduction of sucrose preference by chronic unpredictable mild stress, and its  
219 restoration by a tricyclic antidepressant. *Psychopharmacology (Berl)*. 1987;93(3):358-364.
- 220 14. Porsolt, R.D., Bertin, A., and Jalfre, M. Behavioral despair in mice: a primary screening test for  
221 antidepressants. *Arch Int Pharmacodyn Ther*. 1977;229(2):327-336.
- 222 15. Chen W, et al. Lipocalin-2 exacerbates lupus nephritis by promoting Th1 cell differentiation. *J Am*  
223 *Soc Nephrol*. 2020;31(10):2263-2277.
- 224 16. Ivashkiv LB. IFN $\gamma$ : signalling, epigenetics and roles in immunity, metabolism, disease and  
225 cancer immunotherapy. *Nat Rev Immunol*. 2018;18(9):545-558.

226 **Supplemental Figure 1**

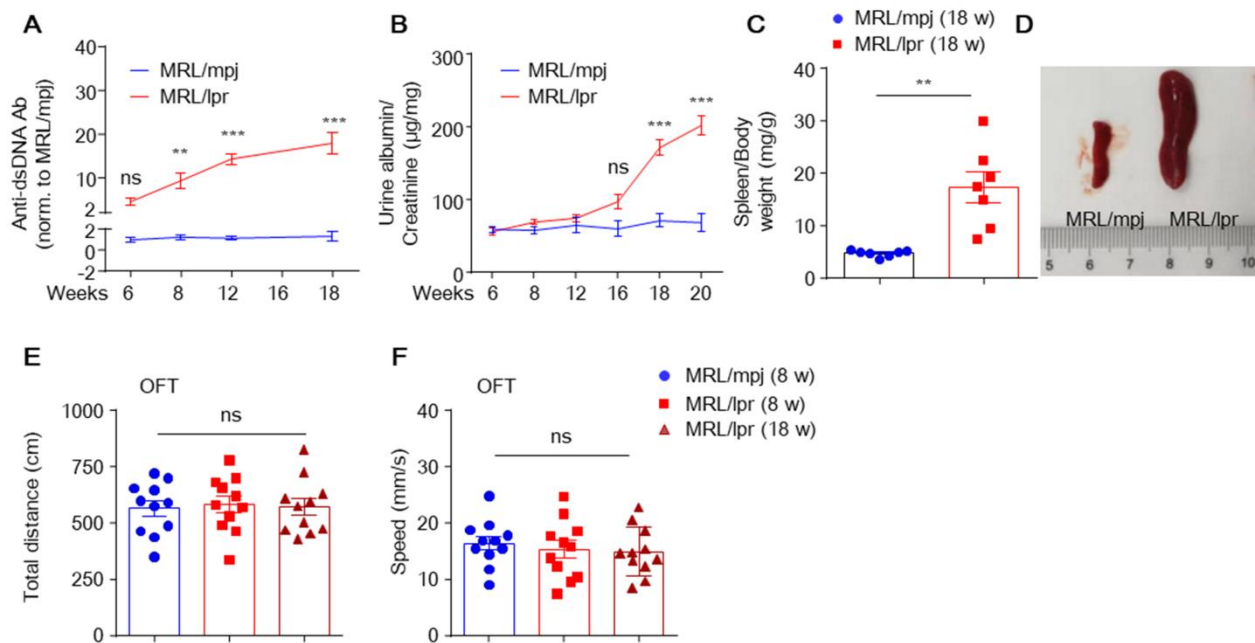

227 **Supplemental Figure 1. Characteristics of typical SLE lesions and the general motion of**  
 228 **MRL/lpr mice, related to Figure 1.**

229 (A) Serum anti-dsDNA IgG titers in age-matched MRL/mpj and MRL/lpr mice were examined  
 230 via ELISA ( $n = 4-5$  mice/group). (B) Albuminuria levels in age-matched MRL/mpj and MRL/lpr  
 231 mice ( $n = 9-10$  mice/group). (C and D) Spleen/body weight ratios and sizes of the spleens from  
 232 the indicated mice ( $n = 7$  mice/group). (E and F) Evaluation of the general locomotion of  
 233 MRL/lpr and MRL/mpj mice ( $n = 11$  mice/group) at 8 and 18 weeks of age via the OFT. The data  
 234 are presented as the mean  $\pm$  SEM. \*\*  $P < 0.01$ ; \*\*\*  $P < 0.001$ ; ns, not significant; unpaired  
 235 Student's  $t$  test or one-way ANOVA followed by Tukey's or Sidak's post hoc test. OFT, open  
 236 field test.

237 **Supplemental Figure 2**

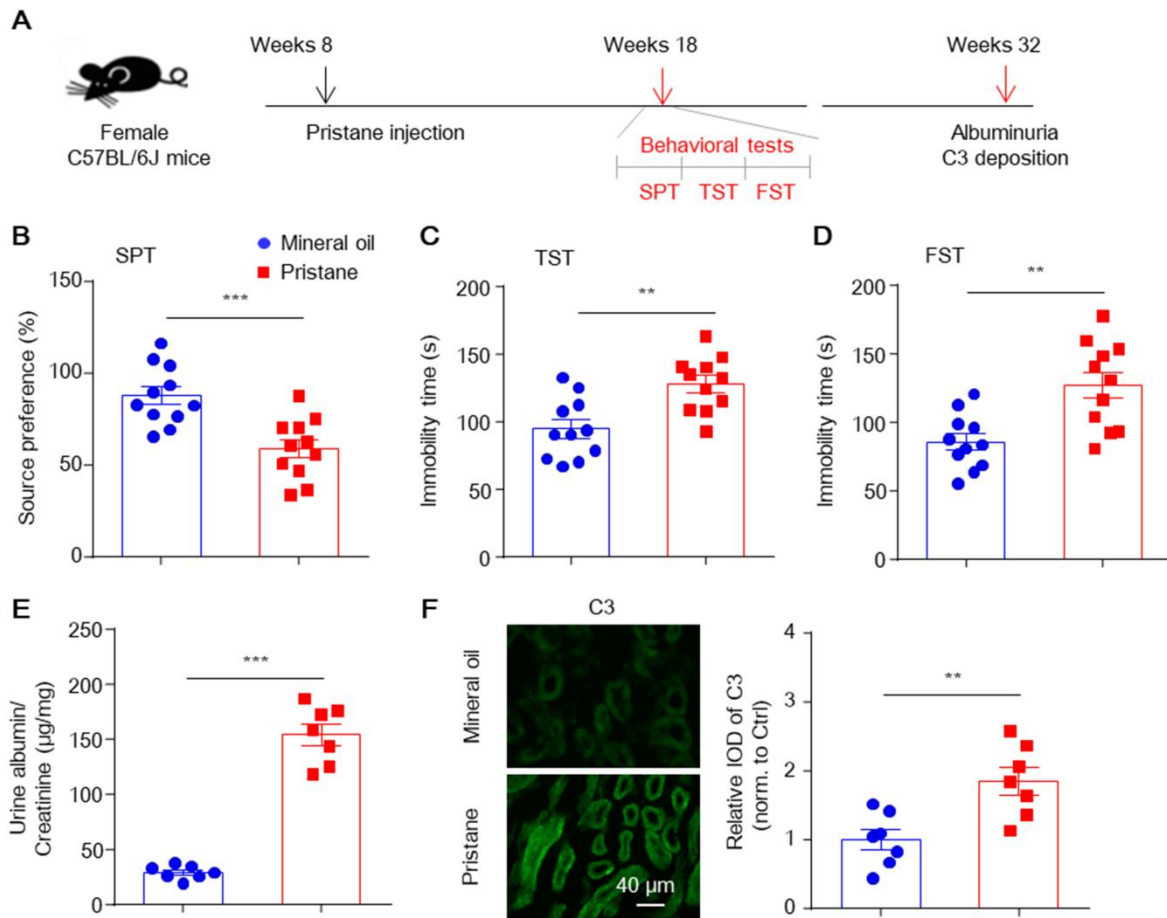

238 **Supplemental Figure 2. Pristane-induced lupus mice exhibit increased depression-like**  
 239 **behavior before the appearance of overt lupus nephritis, related to Figure 1.**

240 (A) Timeline of the experimental procedure for the pristane-induced lupus model. (B-D)  
 241 Evaluation of depression-like behavior in pristane- and mineral oil-injected mice ( $n = 11$   
 242 mice/group). Ten weeks after pristane or mineral oil injection, the mice were subjected to the  
 243 SPT (B), TST (C), and FST (D). Twenty-four weeks after pristane or mineral oil injection,  
 244 albuminuria (E) and C3 deposition in the kidney (F) were evaluated ( $n = 7$ ). The data are  
 245 presented as the mean  $\pm$  SEM. \*\*  $P < 0.01$ ; \*\*\*  $P < 0.001$  according to unpaired Student's  $t$  test.  
 246 SPT, sucrose preference test; TST, tail suspension test; FST, forced swim test; IOD, integrated  
 247 optical density; Ctrl, control.

248 **Supplemental Figure 3**

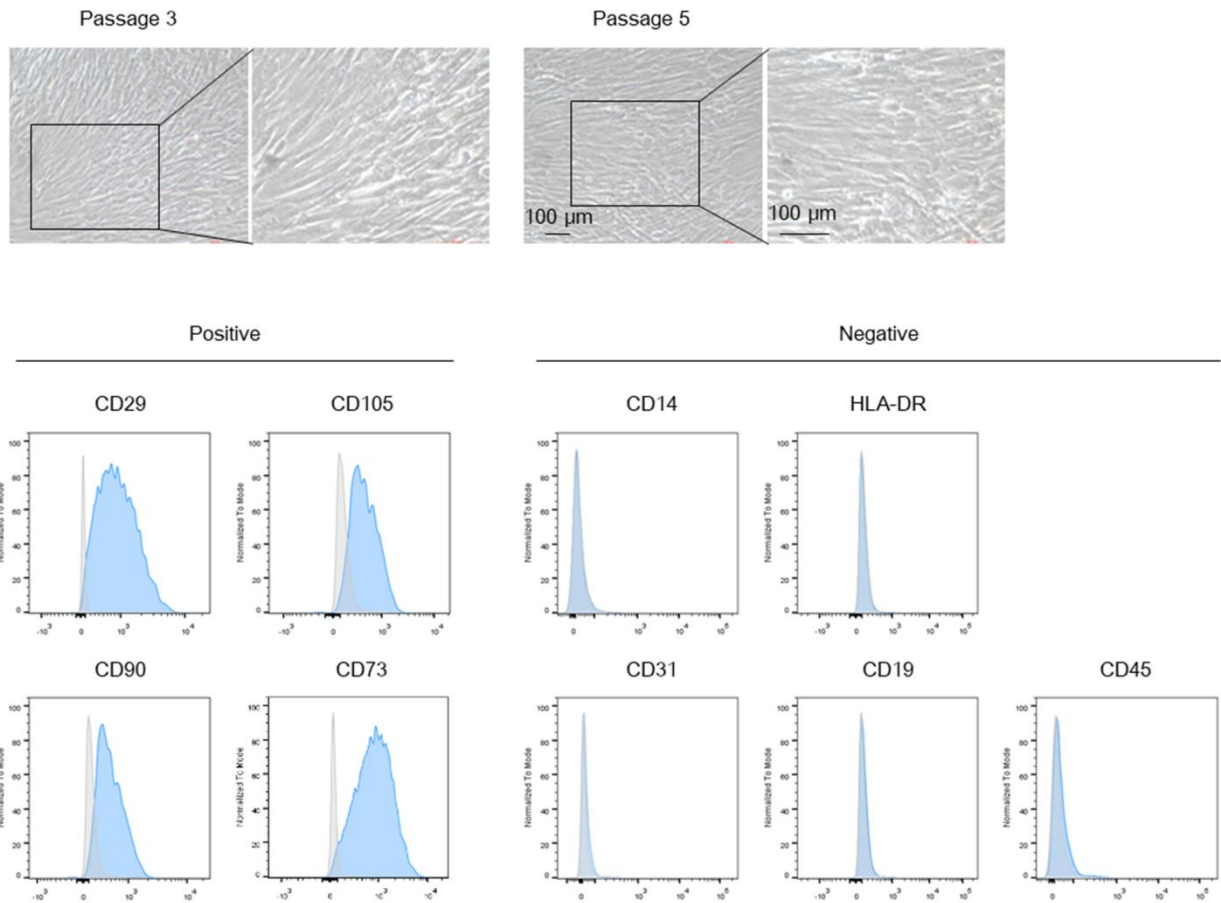

249 **Supplemental Figure 3. Characteristics, including the morphology and phenotype, of**  
250 **hUCMSCs, related to Figure 1.**

251 (A) Representative optical images showing the morphology of P3 and P5 primary hUCMSCs  
252 derived from the primary human umbilical cord. Scale bar, 100 μm. (B) Flow cytometry analysis  
253 showing that hUCMSCs were positive for mesenchymal lineage markers (CD29, CD105, CD90  
254 and CD73), negative for hematopoietic and endothelial markers (CD14, CD31, CD19, and CD45),  
255 and negative for HLA-DR.

256 **Supplemental Figure 4**

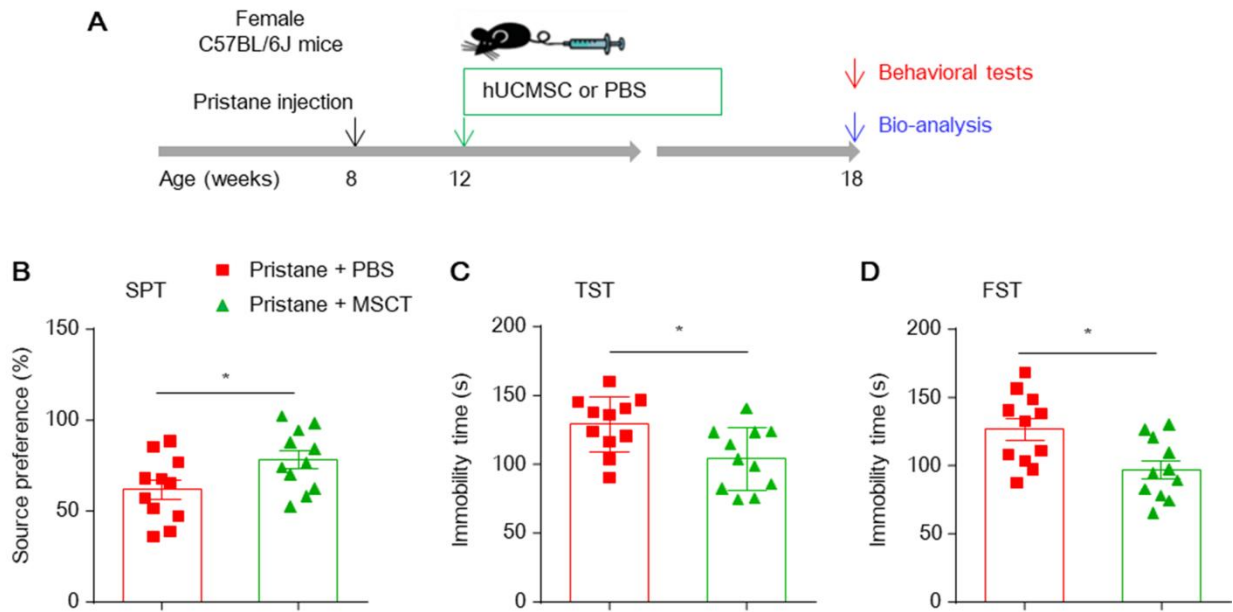

257 **Supplemental Figure 4. MSCT alleviates depression in recipient pristane-induced lupus**  
 258 **mice, related to Figure 1.**

259 (A) Experimental protocol for the treatment of pristane-induced lupus mice ( $n = 11$  mice/group)  
 260 by MSCT. (B-D) Effects of MSCT on depression-like behavior in pristane-induced lupus model  
 261 mice. Eight-week-old C57BL/6J mice were intraperitoneally (i.p.) injected with pristane (500  $\mu$ l).  
 262 Four weeks later, the mice were intravenously injected with hUCMSCs ( $5 \times 10^5$  cells in 500  $\mu$ l of  
 263 PBS) or PBS (as a control). The SPT (B), TST (C), and FST (D) were performed 6 weeks after  
 264 MSCT. The data are presented as the mean  $\pm$  SEM. \*  $P < 0.05$  according to unpaired Student's  $t$   
 265 test. SPT, sucrose preference test; TST, tail suspension test; FST, forced swim test.

266 **Supplemental Figure 5**

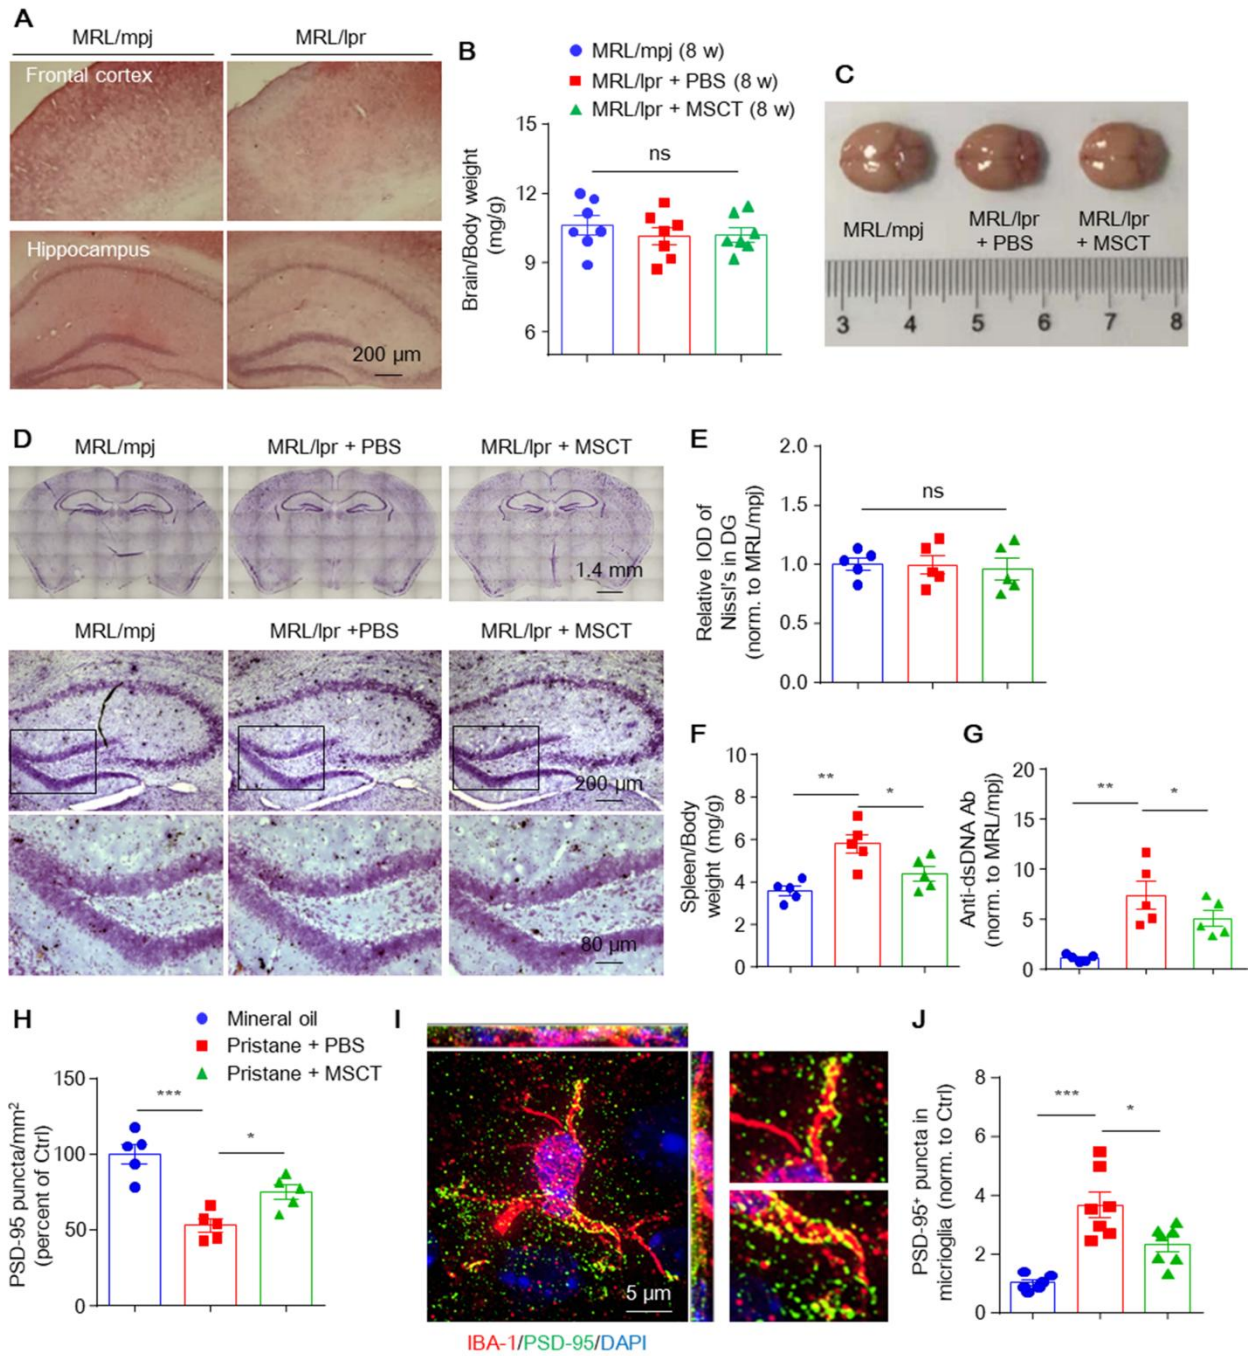

267 **Supplemental Figure 5. No marked anatomical abnormalities or neuron loss are observed**  
 268 **in young MRL/lpr mice, and dendritic loss is observed in the brains of mice with pristane-**  
 269 **induced lupus, related to Figure 2.**

270 (A) Representative images of H&E stained samples showing no evidence of gross anatomical  
271 abnormalities in MRL/lpr mice at 8 weeks. Scale bar, 200  $\mu$ m. (B and C) Brain/body weight  
272 ratios and brain sizes of MRL/mpj and MSCT/PBS treated MRL/lpr mice ( $n = 7$  mice/group). (D  
273 and E) Immunostaining and quantification of Nissl<sup>+</sup> neurons within the hippocampus (with higher  
274 magnification images of the dentate gyrus shown) in 8-week-old MRL/mpj and MSCT/PBS  
275 treated MRL/lpr mice ( $n = 5$  mice/group). The scale bars are indicated. (F and G) Spleen/body  
276 weight ratios and serum anti-dsDNA antibody levels in 8-week-old MRL/mpj and MSCT/PBS  
277 treated MRL/lpr mice ( $n = 5$  mice/group). (H) Quantification of postsynaptic density (PSD-95) in  
278 hippocampal sections from each treatment group ( $n = 5$  mice/group, with an average of 3-4  
279 slices/mouse). (I and J) Immunostaining and quantification of postsynaptic (PSD-95, green)  
280 puncta in hippocampal microglia (IBA-1, red) from each treatment group ( $n = 6-7$  mice/group,  
281 with an average of 3-5 cells/mouse). Scale bar, 5  $\mu$ m. The data are presented as the mean  $\pm$  SEM.  
282 \*  $P < 0.05$ ; \*\*  $P < 0.01$ ; \*\*\*  $P < 0.001$ ; ns, nonsignificant; one-way ANOVA followed by  
283 Tukey's or Sidak's post hoc test. IOD, integrated optical density; Ctrl, control.

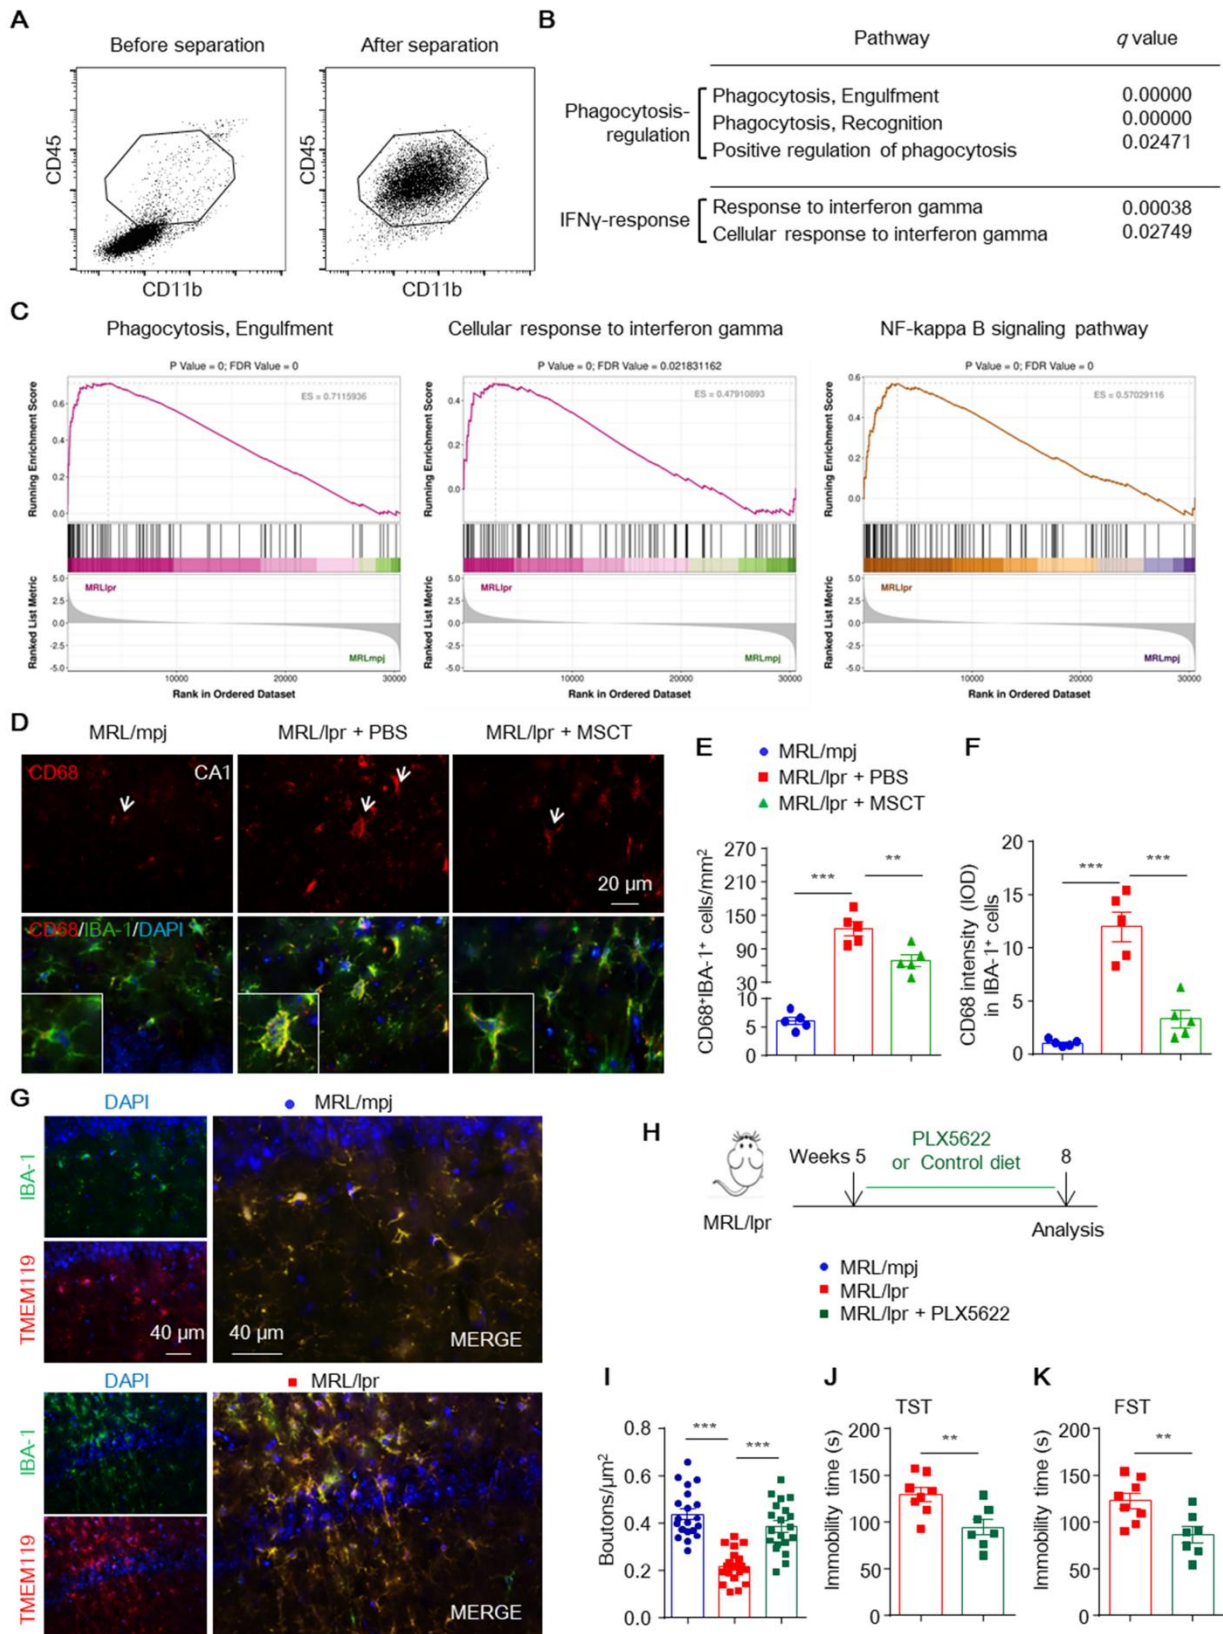

285 **Supplemental Figure 6. MSCT rescues genetic and functional changes in microglia from**  
286 **MRL/lpr mice, related to Figure 2.**

287 (A) Representative dot plots of CD45 and CD11b labeling of microglia (gated in black frame)  
288 collected after microbead kit separation. (B) GO-seq analysis of the phagocytosis-regulating and  
289 IFN- $\gamma$ -responsive gene sets in microglia isolated from MRL/lpr vs MRL/mpj mice. (C) GSEA  
290 revealed that phagocytosis, response to IFN- $\gamma$ , and NF- $\kappa$ B signaling pathway gene sets were  
291 significantly enriched in MRL/lpr microglia compared with MRL/mpj microglia ( $|\text{NES}| > 1$ , NOM  
292  $P$  value  $< 0.05$ , FDR  $q$  value  $< 0.25$ ). (D-F) Representative images and quantification of  
293 CD68<sup>+</sup>IBA-1<sup>+</sup> phagocytes (E) and CD68 staining intensity (F) in hippocampal sections from the  
294 indicated mice ( $n = 5$  mice/group). Scale bar, 20  $\mu\text{m}$ . (G) Representative brain sections  
295 coimmunostained for the microglia-specific marker TMEM119 and IBA-1 showing an  
296 abundance of amoeboid phagocytes (IBA-1) enriched in TMEM119 expression in the evaluated  
297 lupus mice. (H) Pharmacological depletion of microglia in MRL/lpr mice. MRL/lpr mice  
298 received a control or PLX5622 diet from 5 to 8 weeks of age. (I) Quantification of SYP<sup>+</sup> boutons  
299 in the hippocampi of the indicated groups. (J and K) Depression-like behaviors were assessed.  
300 The TST (J) and FST (K) were performed after 3 weeks of PLX5622 treatment. ( $n = 7-8$   
301 mice/group). The data are presented as the mean  $\pm$  SEM. \*\*  $P < 0.01$ ; \*\*\*  $P < 0.001$ ; one-way  
302 ANOVA followed by Tukey's post hoc test or unpaired Student's  $t$  test. TST, tail suspension test;  
303 FST, forced swim test; IOD, integrated optical density.

304 **Supplemental Figure 7**

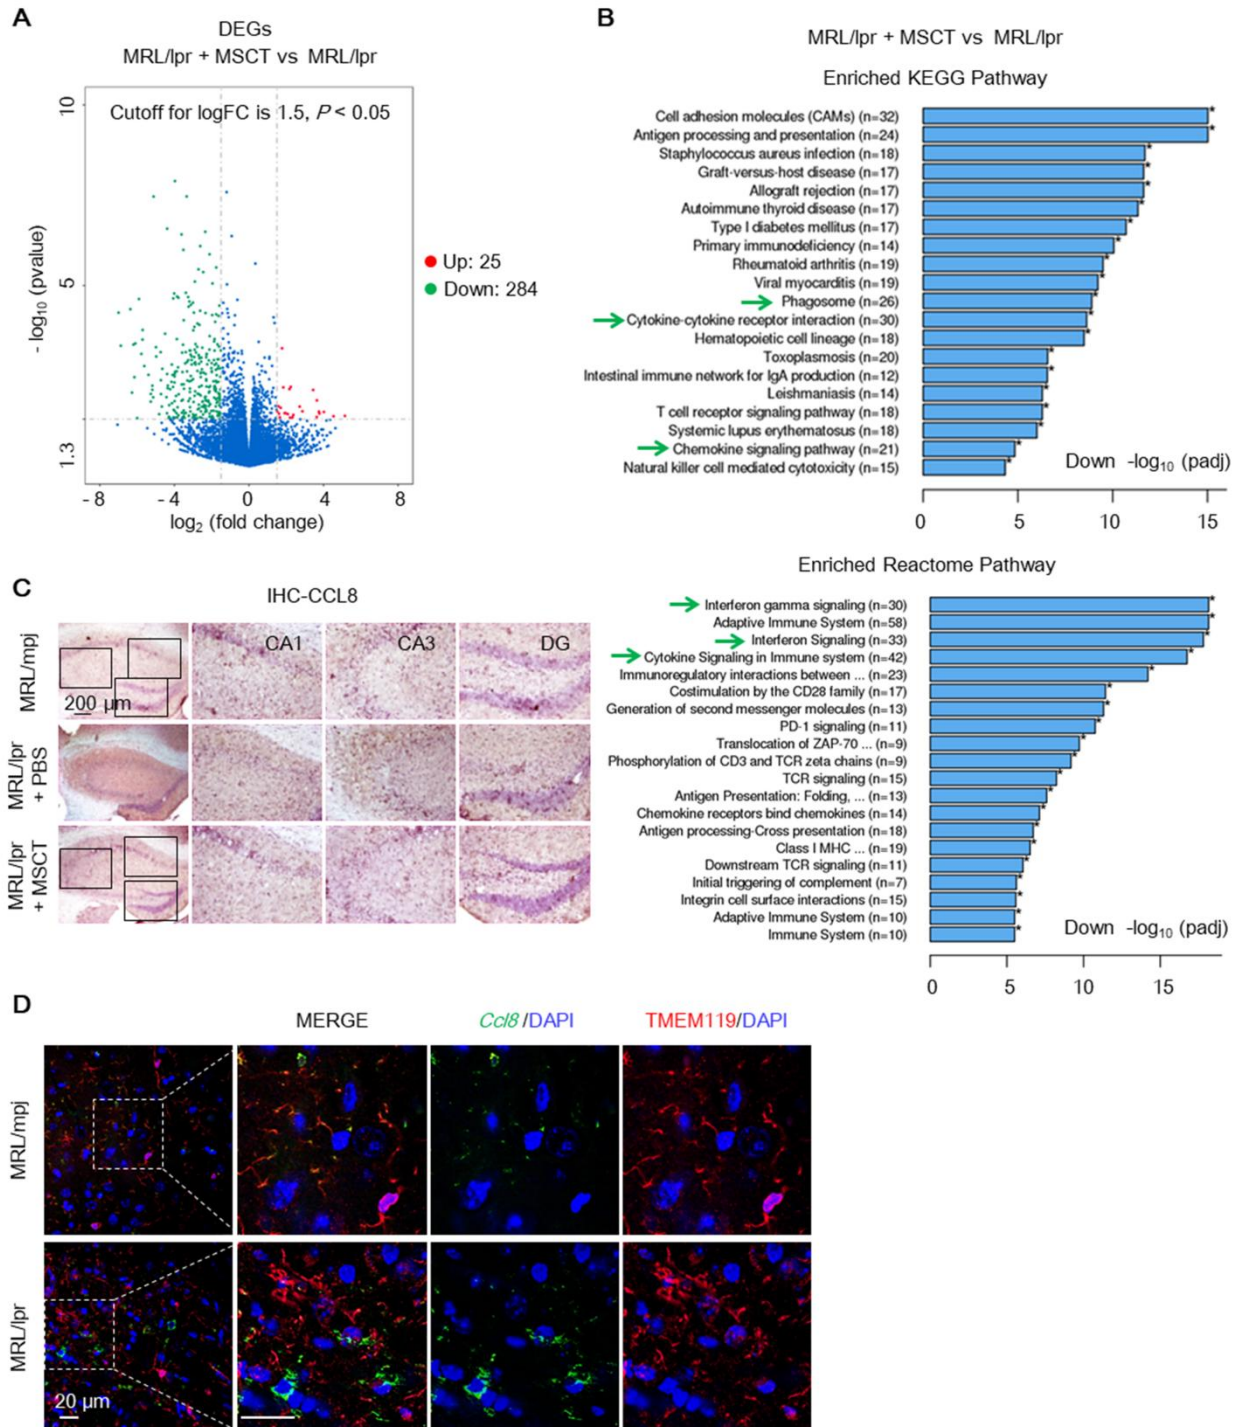

305 **Supplemental Figure 7. RNA-seq and Gene Ontology analyses of the hippocampus of**  
 306 **MRL/lpr mice, related to Figure 3.**

307 (A) Volcano plot of genes with significant fold changes induced by MSCT in MRL/lpr mice  
308 quantified via RNA-seq. Only genes identified with a fold change  $\geq 1.5$  and a  $P$  value  $< 0.05$   
309 were regarded as significantly altered. (B) Enriched KEGG and Reactome pathway analyses  
310 revealed that MSCT reversed the changes in pathways in the hippocampi of MRL/lpr mice  
311 identified by sequencing. (C) Representative image of CCL8 immunostaining in hippocampal  
312 sections from 8-week-old MRL/mpj and MSCT- or PBS-treated MRL/lpr mice. Scale bar, 200  
313  $\mu\text{m}$ . (D) RNAscope in situ hybridization revealed that elevated *Ccl8* expression is rarely detected  
314 in microglia (colabeled with anti-TMEM119 antibody) in hippocampal sections from 8-week-old  
315 MRL/lpr mice. Scale bars, 20  $\mu\text{m}$ . vs, versus.

316 Supplemental Figure 8

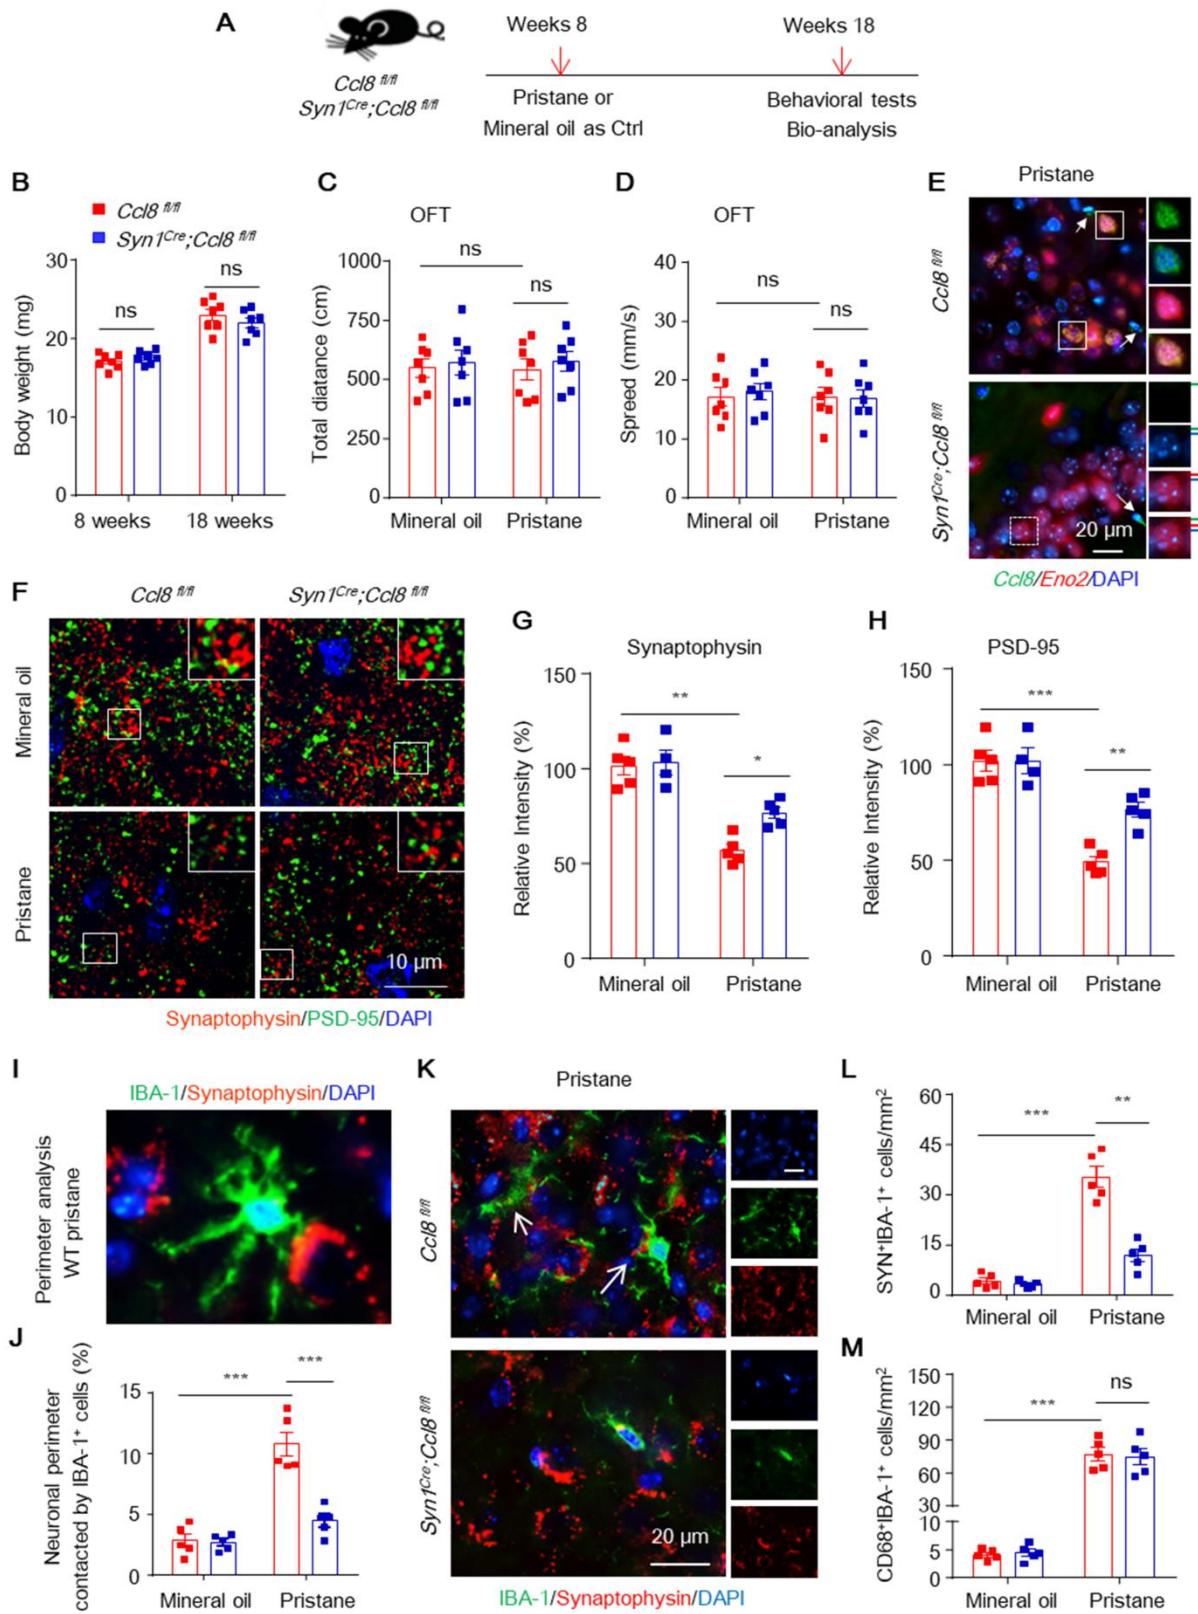

317 **Supplemental Figure 8. Neuronal *Ccl8* deficiency prevents depression in pristane-induced**  
318 **lupus mice, related to Figure 3.**

319 (A) Experimental outline describing model induction and analysis. (B) Body weights of mineral  
320 oil (used as a control, Ctrl) or pristane treated *Ccl8<sup>fl/fl</sup>* and *Syn1<sup>Cre</sup>;Ccl8<sup>fl/fl</sup>* mice. (C and D)  
321 General locomotor activity of each treatment group ( $n = 7$  mice/group). Ten weeks after pristane  
322 injection, the mice were subjected to the OFT. (E) RNAscope in situ hybridization confirmed  
323 abrogated expression of *Ccl8* mRNAs in the neurons (colabeled with the *Eno2* probe) of pristane  
324 treated *Syn1<sup>Cre</sup>;Ccl8<sup>fl/fl</sup>* mice. Scale bar, 20  $\mu\text{m}$ . The square indicates *Ccl8<sup>+</sup>Eno2<sup>+</sup>* neurons, the  
325 dashed square indicates *Ccl8<sup>-</sup>Eno2<sup>+</sup>* neurons, whereas the arrowhead indicates *Ccl8<sup>+</sup>Eno2<sup>-</sup>*  
326 nonneuronal cells. (F-H) Immunostaining and quantification of presynaptic (synaptophysin, red)  
327 and postsynaptic (PSD-95, green) boutons in hippocampal sections from each treatment group ( $n$   
328 = 4-5 mice/group, with an average of 3-4 slices/mouse). Scale bar, 10  $\mu\text{m}$ . (I and J) Images and  
329 proportions of neuronal perimeter contacted by IBA-1<sup>+</sup> cells in hippocampal slices ( $n = 5$   
330 mice/group). (K) Images of synaptic structures (SYP<sup>+</sup>) localized in contact with CNS phagocytes  
331 (IBA-1) in brain sections from the indicated mice. (L) The number of SYP<sup>+</sup>IBA-1<sup>+</sup> phagocytes  
332 per mm<sup>2</sup> is shown. The data are presented as the mean  $\pm$  SEM. (M) Quantification of CD68<sup>+</sup>IBA-  
333 1<sup>+</sup> phagocytes in hippocampal sections from the indicated mice ( $n = 5$  mice/group). \*  $P < 0.05$ ;  
334 \*\*  $P < 0.01$ ; \*\*\*  $P < 0.001$ ; ns, not significant; one-way ANOVA followed by Tukey's or Sidak's  
335 post hoc test.

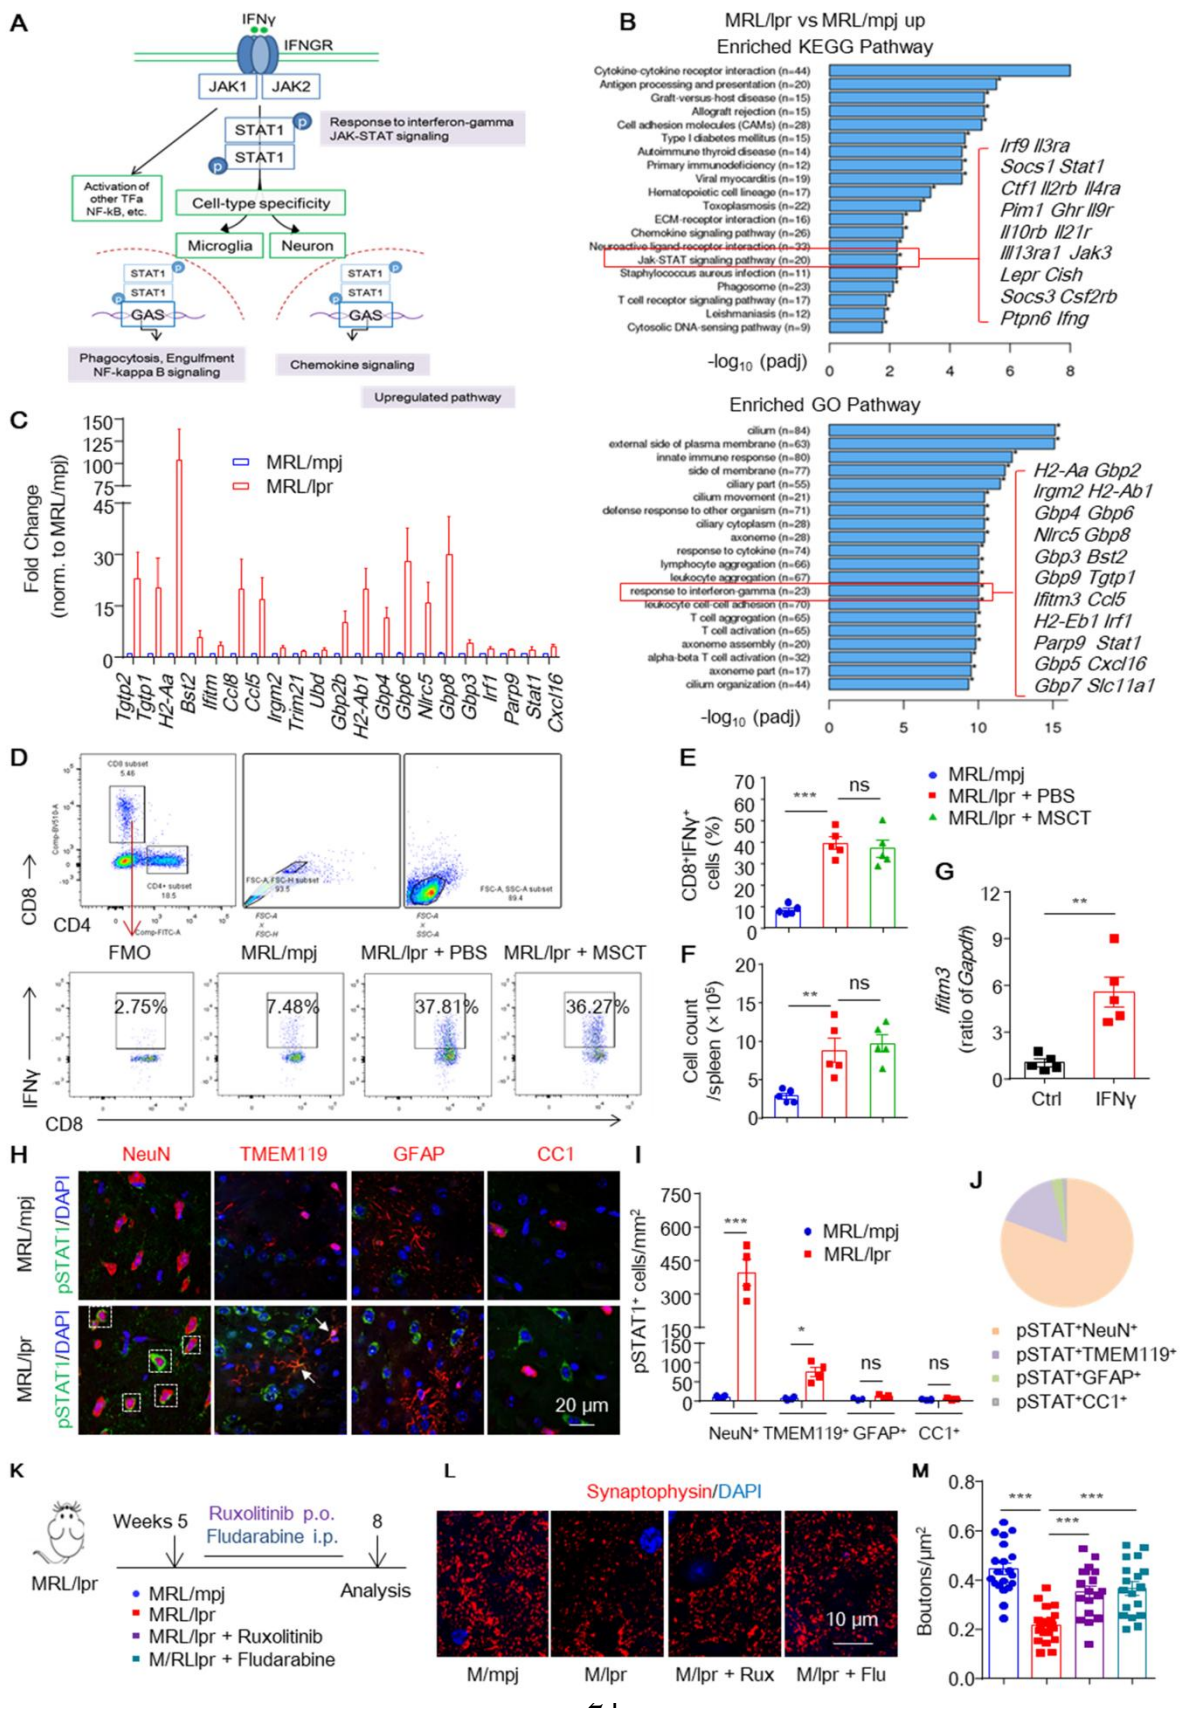

337 **Supplemental Figure 9. IFN- $\gamma$ /JAK-STAT1 signaling contributes to MSCT-mediated**  
338 **neuroprotection in recipient MRL/lpr mice, related to Figure 4.**

339 (A) Schematic of the IFN- $\gamma$  signaling pathway (16) and pathway map of genes activated in  
340 response to IFN- $\gamma$  that are differentially expressed in lupus brain. (B) KEGG and GO analyses of  
341 the identified upregulated gene sets in hippocampal tissues from MRL/lpr mice. (C) RNA-seq  
342 analysis revealed elevated expression of interferon-responsive genes in microglia isolated from  
343 MRL/lpr mice compared with those isolated from MRL/mpj mice. (D-F) Gating schemes for  
344 flow cytometry analysis of CD3<sup>+</sup>CD4<sup>+</sup>IFN- $\gamma$ <sup>+</sup> and CD3<sup>+</sup>CD8<sup>+</sup>IFN- $\gamma$ <sup>+</sup> cells in the mouse spleen.  
345 The percentages (E) and numbers (F) of splenic CD8<sup>+</sup>IFN- $\gamma$ <sup>+</sup> cells in the indicated groups ( $n = 5$   
346 mice/group). (G) Hippocampal neurons were treated with IFN- $\gamma$  (10 ng/ml) and *Ifitm3* expression  
347 was assessed 6 hours after treatment. (H and I) Representative images of brain sections  
348 coimmunostained for pSTAT1 together with neuronal (NeuN<sup>+</sup>) and nonneuronal markers  
349 (TMEM119 for microglia, GFAP for astrocytes, and CC1 for oligodendrocytes) and  
350 quantification of positive cells in the hippocampi of the indicated groups ( $n = 3-4$  mice per group).  
351 Scale bar, 20  $\mu$ m. The dashed square indicates pSTAT1<sup>+</sup> neurons whereas the arrowhead  
352 indicates pSTAT1<sup>+</sup> microglia. (J) Quantification analysis of the fraction of pSTAT1<sup>+</sup> cells that  
353 coexpressed the indicated markers in the hippocampi of 8-week-old MRL/lpr mice. (K-M)  
354 Ruxolitinib (Rux, p.o.) or fludarabine (Flu, i.p.) was given to MRL/lpr mice from 5 to 8 weeks of  
355 age. SYP immunoreactivity were analyzed in 18-20 CA1 neurons from 3-4 mice per group (L  
356 and M). Scale bar, 10  $\mu$ m. The data are presented as the mean  $\pm$  SEM. \*  $P < 0.05$ ; \*\*  $P < 0.01$ ;  
357 \*\*\*  $P < 0.001$ ; ns, not significant; unpaired Student's  $t$  test or one-way ANOVA followed by  
358 Tukey's or Sidak's post hoc test.

359 **Supplemental Figure 10**

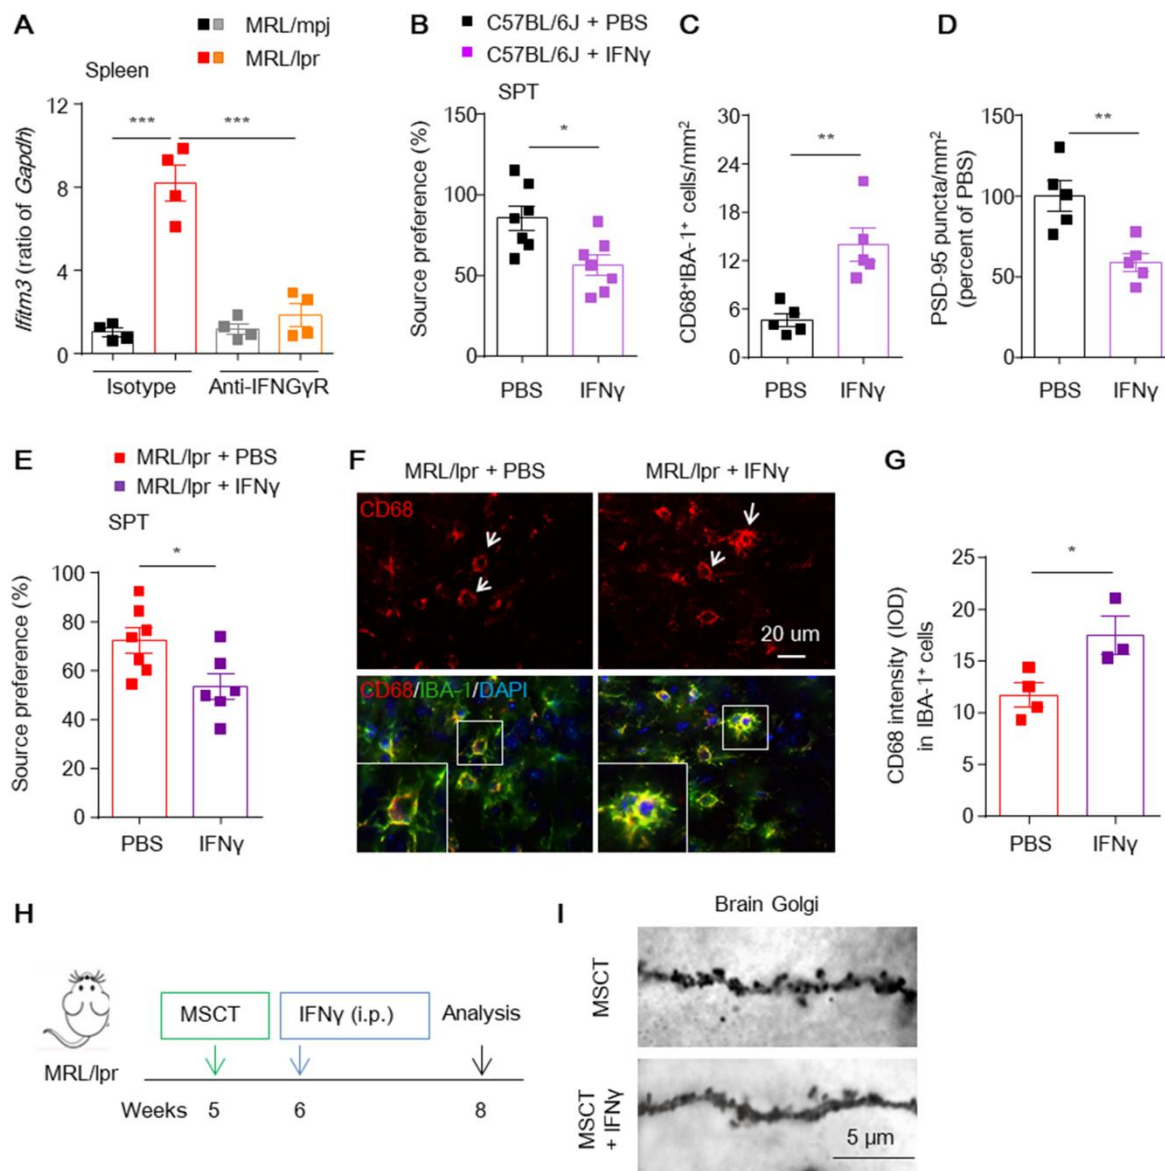

360 **Supplemental Figure 10. Blockade of IFN- $\gamma$  signaling rescues depression phenotypes in**  
 361 **MRL/lpr mice, related to Figure 5.**

362 (A) qPCR analysis of *Ifitm3* expression in the spleens of the indicated mice ( $n = 4$  mice/group).  
 363 (B) Depression-like behaviors (SPTs) were assessed in PBS or IFN- $\gamma$  treated C57BL/6J mice ( $n =$   
 364 7 mice/group). (C and D) Quantification of CD68<sup>+</sup>IBA-1<sup>+</sup> phagocytes (C) and PSD-95 staining  
 365 intensity (D) in the hippocampi of the indicated mice ( $n = 5$  mice/group). (E) Depression-like

366 behaviors (SPTs) were assessed in PBS or IFN- $\gamma$  treated MRL/lpr mice (8 weeks old,  $n = 6-7$   
367 mice/group). **(F and G)** Representative images and quantification of CD68 staining intensity in  
368 hippocampal sections from the indicated mice ( $n = 3-4$  mice/group). Scale bar, 20  $\mu\text{m}$ . **(H)**  
369 Experimental outline describing model induction and analysis. **(I)** Image of Golgi-stained  
370 dendritic spines from DG granule neurons in MSCT (alone or in combination with IFN- $\gamma$ ) treated  
371 MRL/lpr mice. Scale bar, 5  $\mu\text{m}$ . The data are presented as the mean  $\pm$  SEM. \*  $P < 0.05$ ; \*\*  $P <$   
372 0.01; \*\*\*  $P < 0.001$ ; unpaired Student's  $t$  test or one-way ANOVA followed by Tukey's post hoc  
373 test. SPT, sucrose preference test; IOD, integrated optical density.

374 **Supplemental Figure 11**

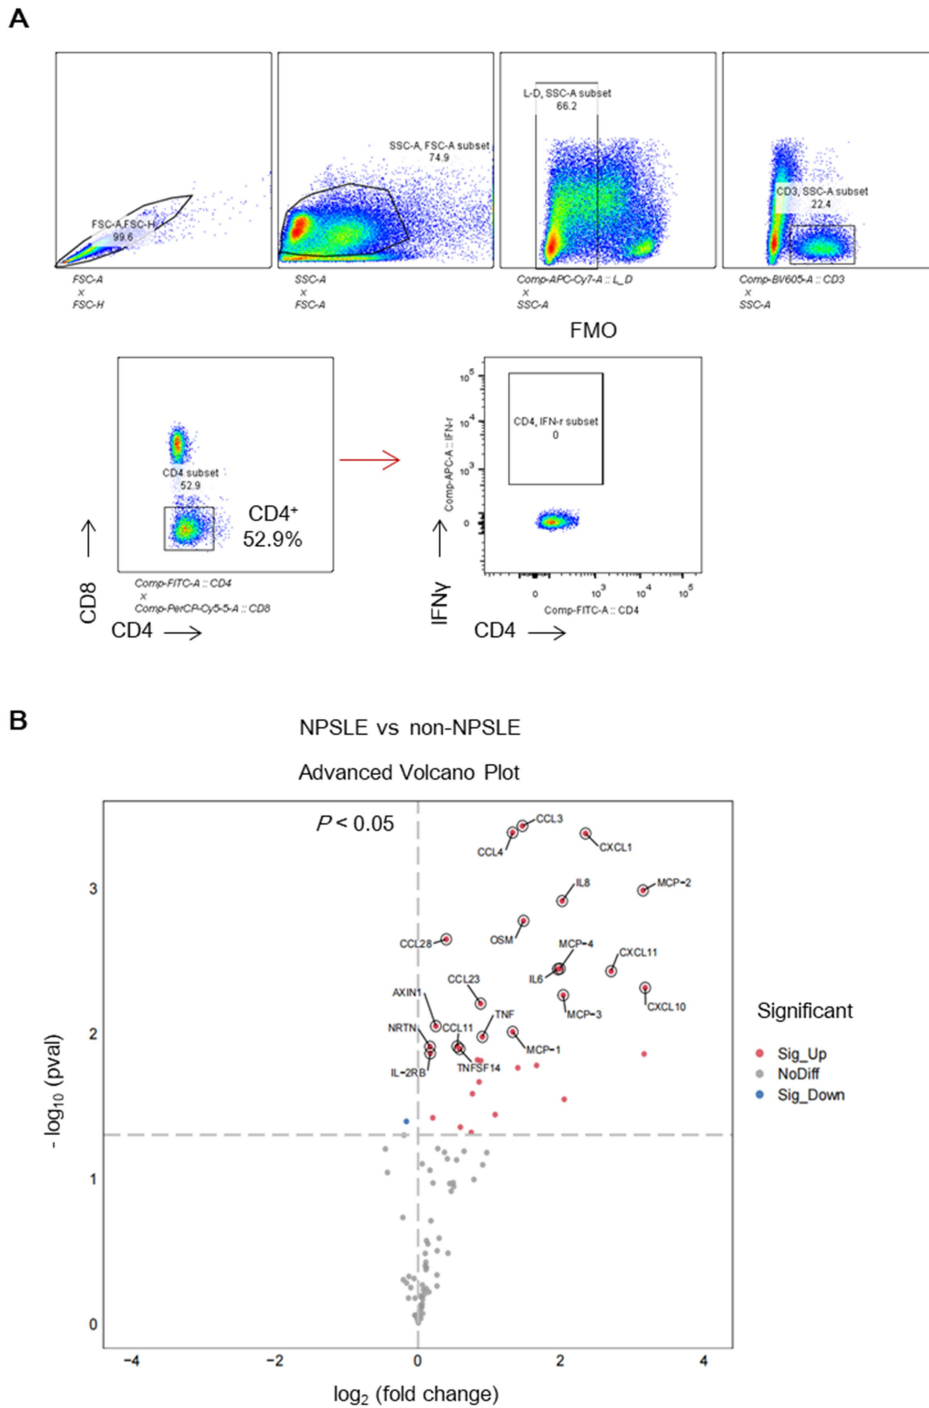

375 **Supplemental Figure 11. Flow cytometry analysis of CD4<sup>+</sup>IFN- $\gamma$ <sup>+</sup> T cells in human PBMCs**  
 376 **(A), and volcano plot of O-link-quantified differentially expressed proteins between patients**  
 377 **with NPSLE and those with non-NPSLE (B), related to Figure 6.**

378 **Supplemental Table 1. Enrichment analysis of genes altered in MRL/lpr compared with**  
 379 **MRL/mpj mice by GSEA with KEGG modules. The top 20 pathway lists were generated with the**  
 380 **genes with greater expression in MRL/lpr than in MRL/mpj ( $\geq 1.5$ -fold changes and  $P$  value  $< 0.05$ ).**  
 381 **MRL/mpj  $<$  MRL/lpr (KEGG)**

| 382 Pathways                            | genes | P value  | Select genes within pathway                                                                                                                                                                                                                                        |
|-----------------------------------------|-------|----------|--------------------------------------------------------------------------------------------------------------------------------------------------------------------------------------------------------------------------------------------------------------------|
| Cytokine-cytokine receptor interaction  | 44    | 5.74E-11 | Ccl8/Kdr/Cxcl13/Cxcl10/Ccl5/Ngfr/Ccr1/Tnfrsf10/Ltb/Ccr2/Il3ra/Tgfr2/Cxcl11/Kitl/Il18r1/Tnfrsf1b/Ctfl/Cxcr4/Ccl3/Cxcl16/Il2rb/Il4ra/Ghr/Pdgfr/Il9r/Il10rb/Bmp2/Met/Il21r/Il13ra1/Cxcr6/Lepr/Ccr5/Csf2rb/Cxcl9/Edar/Ccr7/Xcr1/Ccl28/Tnfrsf14/Cxcr3/Cd27/Tnfrsf8/Ifng |
| Antigen processing and presentation     | 20    | 3.22E-08 | H2-Aa/H2-Ab1/B2m/Cd74/H2-Eb1/H2-T22/H2-T9/Tap1/H2-T23/Cd8a/Cd4/Ciita/Tap2/H2-M2/Tapbp/H2-DMb2/H2-T24/H2-DMb1/H2-K1/Ifng                                                                                                                                            |
| Allograft rejection                     | 15    | 1.64E-07 | H2-Aa/H2-Ab1/H2-Eb1/H2-T22/H2-T9/H2-T23/H2-M2/H2-DMb2/H2-T24/Cd28/Prfl/Gzmb/H2-DMb1/H2-K1/Ifng                                                                                                                                                                     |
| Graft-versus-host disease               | 15    | 1.64E-07 | H2-Aa/H2-Ab1/H2-Eb1/H2-T22/H2-T9/H2-T23/H2-M2/H2-DMb2/H2-T24/Cd28/Prfl/Gzmb/H2-DMb1/H2-K1/Ifng                                                                                                                                                                     |
| Cell adhesion molecules (CAMs)          | 28    | 2.47E-07 | H2-Aa/H2-Ab1/Cldn5/Ptprc/H2-Eb1/H2-T22/H2-T9/Itgal/H2-T23/Sdc2/Cldn3/Cd8a/Cd2/Cd274/Cd4/H2-M2/Spn/H2-DMb2/Itgb7/Cldn19/H2-T24/Cd28/Pdcd1/F11r/H2-DMb1/H2-K1/Cdh4/Cd6                                                                                               |
| Type I diabetes mellitus                | 15    | 1.08E-06 | H2-Aa/H2-Ab1/H2-Eb1/H2-T22/H2-T9/H2-T23/H2-M2/H2-DMb2/H2-T24/Cd28/Prfl/Gzmb/H2-DMb1/H2-K1/Ifng                                                                                                                                                                     |
| Viral myocarditis                       | 19    | 1.74E-06 | H2-Aa/H2-Ab1/Casp9/Myh7/H2-Eb1/H2-T22/H2-T9/Itgal/H2-T23/Rac2/H2-M2/Casp3/H2-DMb2/H2-T24/Cd28/Prfl/H2-DMb1/H2-K1/Casp8                                                                                                                                             |
| Primary immunodeficiency                | 12    | 1.92E-06 | Ptprc/Tap1/Cd3e/Cd8a/Cd3d/Cd4/Ciita/Tap2/Cd79a/Lck/Cd19/Jak3                                                                                                                                                                                                       |
| Autoimmune thyroid disease              | 14    | 2.05E-06 | H2-Aa/H2-Ab1/H2-Eb1/H2-T22/H2-T9/H2-T23/H2-M2/H2-DMb2/H2-T24/Cd28/Prfl/Gzmb/H2-DMb1/H2-K1                                                                                                                                                                          |
| Primary immunodeficiency                | 12    | 3.59E-05 | Ptprc/Tap1/Cd3e/Cd8a/Cd3d/Cd4/Ciita/Tap2/Cd79a/Lck/Cd19/Jak3                                                                                                                                                                                                       |
| Autoimmune thyroid disease              | 14    | 5.42E-05 | H2-Aa/H2-Ab1/H2-Eb1/H2-T22/H2-T9/H2-T23/H2-M2/H2-DMb2/H2-T24/Cd28/Prfl/Gzmb/H2-DMb1/H2-K1                                                                                                                                                                          |
| Hematopoietic cell lineage              | 17    | 2.50E-05 | Cd3g/H2-Eb1/Cd24a/Cd3e/Il3ra/Cd8a/Cd2/Cd3d/Cd5/Kitl/Cd4/Cd44/Itga2/Cd59b/Il4ra/Il9r/Cd19                                                                                                                                                                           |
| Toxoplasmosis                           | 22    | 5.87E-05 | H2-Aa/H2-Ab1/Casp9/Lama3/Igtp/Pla2g5/H2-Eb1/Bcl2/Tlr2/Ciita/Socs1/Stat1/Casp3/H2-DMb2/Il10rb/Pla2g2d/Lamc2/Ccr5/H2-DMb1/Lamb3/Casp8/Ifng                                                                                                                           |
| Chemokine signaling pathway             | 26    | 2.65E-04 | Ccl8/Cxcl13/Cxcl10/Ccl5/Grk5/Ccr1/Adey7/Rac2/Ccr2/Cxcl11/Stat1/Plcb4/Cxcr4/Hck/Ccl3/Cxcl16/Jak3/Cxcr6/Ccr5/Gnb4/Cxcl9/Ccr7/Xcr1/Prkcd/Ccl28/Cxcr3                                                                                                                  |
| ECM-receptor interaction                | 16    | 2.71E-04 | Spp1/Lama3/Col6a3/Thbs4/Sdc2/Sv2c/Thbs1/Col5a2/Cd44/Itga2/Itgb7/Col4a4/Col5a3/Lamc2/Lamb3/Itgb6                                                                                                                                                                    |
| Jak-STAT signaling pathway              | 20    | 4.76E-04 | Irf9/Il3ra/Socs1/Stat1/Ctfl/Il2rb/Il4ra/Pim1/Ghr/Il9r/Il10rb/Il21r/Il13ra1/Jak3/Lepr/Ciita/Socs3/Csf2rb/Ptpn6/Ifng                                                                                                                                                 |
| Neuroactive ligand-receptor interaction | 33    | 4.82E-04 | Htr2c/Avpr1a/Crhr2/Adra2b/Trhr/Grm8/Npffr1/Drd2/Grik3/Glp1r/S1pr3/Mc3r/Tspo/Adra2a/Gabre/Galr1/Glra1/Calcr1/Lpar6/Ghr/Gpr35/Htr7/Lhb/Sstr5/Ptafr/Oxtr/Grm4/Gpr50/Lepr/Agtr1a/Oprk1/Grin2d/Hrh1                                                                     |
| <i>Staphylococcus aureus</i> infection  | 11    | 5.21E-04 | H2-Aa/H2-Ab1/H2-Eb1/Itgal/C1s1/H2-DMb2/C1ra/Ptafr/Fcgr4/H2-DMb1/Hc                                                                                                                                                                                                 |
| Phagosome                               | 23    | 7.37E-04 | H2-Aa/H2-Ab1/H2-Eb1/H2-T22/H2-T9/Thbs4/Tap1/H2-T23/Cybb/Clec7a/Thbs1/Cyba/Tlr2/Tap2/H2-M2/Itga2/H2-DMb2/H2-T24/C1ra/Fcgr4/H2-DMb1/Ncf2/H2-K1                                                                                                                       |
| T-cell receptor signaling pathway       | 17    | 0.001353 | Cd3g/Ptprc/Tec/Cd3e/Cd8a/Cd3d/Cd4/Lat/Cd247/Cd28/Pdcd1/Lck/Card11/Prkcq/Ptpn6/Ifng/Grp2                                                                                                                                                                            |
| Leishmaniasis                           | 12    | 0.001616 | H2-Aa/H2-Ab1/H2-Eb1/Cyba/Tlr2/Stat1/H2-DMb2/Fcgr4/H2-DMb1/Ncf2/Ptpn6/Ifng                                                                                                                                                                                          |
| Cytosolic DNA-sensing pathway           | 9     | 0.001973 | Cxcl10/Ccl5/Zbp1/Irf7/Mavs/Ddx58/Ifi202b/LOC100044068/Casp1                                                                                                                                                                                                        |

383 **Supplemental Table 2. Enrichment analysis of genes altered in MRL/lpr+MSCT vs. MRL/lpr**  
 384 **mice by GSEA with the KEGG (top) and Reactome (bottom) modules. A list of genes was generated**  
 385 **with lower expression in MRL/lpr+MSCT than in MRL/lpr ( $\geq 1.5$ -fold change and  $P$  value  $< 0.05$ ).**

386 **MRL/lpr + MSCT < MRL/lpr (KEGG)**

| Rnk | Pathways                               | P value | Altered genes                                                                                                                                                                               |
|-----|----------------------------------------|---------|---------------------------------------------------------------------------------------------------------------------------------------------------------------------------------------------|
| 1   | Antigen processing and presentationm   | 9.4E-18 | H2-K1/H2-Ab1/H2-T23/H2-D1/B2m/H2-DMb2/Ciita/Tap1/H2-M2/H2-Aa/H2-Eb1/H2-DMb1/H2-T22/H2-T9/Cd74/H2-Q1/Cd8a/Tap2/ Ifi30/ Ifng/ Tapbp/H2-Ob/Psme2/Cd4                                           |
| 2   | Cell adhesion molecules (CAMs)         | 1.5E-17 | H2-K1/H2-Ab1/H2-T23/Ptprc/Itgb7/Itgal/H2-D1/Sell/H2-DMb2/H2-M2/Cd2/Cd274/H2-Aa/Spn/H2-Eb1/H2-DMb1/H2-T22/H2-T9/H2-Q1/Pdcd1/Cd8a/Icam1/Ctla4/Siglec1/Cd6/Itgb2/Icos/Cd28/H2-Ob/Cd4/Cd22/Cd86 |
| 3   | <i>Staphylococcus aureus</i> infection | 4.7E-14 | H2-Ab1/C1s1/Itgal/H2-DMb2/C1qc/H2-Aa/C1ra/C1qb/H2-Eb1/H2-DMb1/Ptafr/Cfh/Icam1/Itgb2/C3/H2-Ob/C4b/C1qa                                                                                       |
| 4   | Allograft rejection                    | 9.1E-14 | H2-K1/H2-Ab1/H2-T23/H2-D1/H2-DMb2/H2-M2/H2-Aa/H2-Eb1/H2-DMb1/H2-T22/H2-T9/H2-Q1/Ifng/Cd28/H2-Ob/Cd86/Gzmb                                                                                   |
| 5   | Graft-versus-host disease              | 9.1E-14 | H2-K1/H2-Ab1/H2-T23/H2-D1/H2-DMb2/H2-M2/H2-Aa/H2-Eb1/H2-DMb1/H2-T22/H2-T9/H2-Q1/Ifng/Cd28/H2-Ob/Cd86/Gzmb                                                                                   |
| 12  | Phagosome                              | 1.1E-10 | H2-K1/H2-Ab1/H2-T23/H2-D1/H2-DMb2/Tap1/H2-M2/H2-Aa/Cybb/C1ra/Clec7a/H2-Eb1/H2-DMb1/H2-T22/H2-T9/H2-Q1/Mrc2/Tap2/Ncf4/Itgb2/C3/Tlr4/H2-Ob/Itga2/Cyba/Cd14                                    |
| 13  | Cytokine-cytokine receptor interaction | 2.2E-10 | Ccl8/Cxcl10/Ltb/Cxcl13/Cxcl11/Ccr2/Il2ra/Ccl5/Il2rg/Il18r1/Il9r/Cxcr6/Tnfrsf25/Il2rb/Cxcr3/Cxcl16/Tnfrsf1b/Ccr9/Ifng/Cxcr4/Xcr1/Csf2rb/Csf1/Il7r/Ccr5/Cd27/Tnfrsf14/Ccr7/Ccl22/Osmr         |
| 18  | Systemic lupus erythematosus           | 1.4E-07 | H2-Ab1/C1s1/H2-DMb2/C1qc/H2-Aa/C1ra/C1qb/H2-Eb1/H2-DMb1/Ifng/Cd28/Hist1h4k/C3/H2-Ob/C4b/C1qa/Trim21/Cd86                                                                                    |
| 19  | Chemokine signaling pathway            | 2.2E-06 | Ccl8/Cxcl10/Cxcl13/Cxcl11/Ccr2/Rac2/Ccl5/Cxcr6/Stat1/Cxcr3/Dock2/Itk/Cxcl16/Ccr9/Cxcr4/Xcr1/Ccr5/Ccr7/Ccl22/Hck/Adey7                                                                       |
| 24  | Jak-STAT signaling pathway             | 2.3E-04 | Socs1/Il2ra/Irf9/Il2rg/Il9r/Stat1/Il2rb/Pim1/Ifng/Stat5a/Csf2rb/Il7r/Spry1/Osmr                                                                                                             |
| 27  | Endocytosis                            | 8.2E-04 | H2-K1/Ldlr/H2-T23/Psd4/H2-D1/H2-M2/Il2ra/Il2rg/Il2rb/H2-T22/H2-T9/Pard6b/H2-Q1/Acap1/Cxcr4/Ccr5/Git2/Arf6                                                                                   |

387 **MRL/lpr + MSCT < MRL/lpr (Reactome)**

| Rnk | Description                         | P value | Altered genes                                                                                                                                                                                                                                                                                                                             |
|-----|-------------------------------------|---------|-------------------------------------------------------------------------------------------------------------------------------------------------------------------------------------------------------------------------------------------------------------------------------------------------------------------------------------------|
| 1   | Adaptive Immune System              | 2.3E-21 | H2-K1/H2-Ab1/Lcp2/H2-T23/Ifitm1/Psmb9/Itgb7/Psmb8/Cd3d/Cd3e /Itgal/H2-D1/H2-L/B2m/Sell/Cd19/H2-DMb2/Lck/Lat/Tap1/H2-M2/Cd274/H2-Aa/Cybb/Erap1/Ifitm3/Cd3g/Cd247/Cd79a/H2-Eb1/H2-DMb1/H2-T22/H2-T9/Cd74/H2-Q1/Pdcd1/Cd8a/Tap2/Itk/Syk/Ncf4/Icam1/Ctla4/Ifi30/Ripk2/Itgb2/Icos/Cd28/Grp2/Tapbp/C3/Tnfrsf14/H2-Ob/Psme2/Cyba/Cd4/Card11/Cd86 |
| 2   | Interferon gamma signaling          | 2.9E-21 | Gbp2/H2-K1/H2-Ab1/H2-T23/Irf1/Irf4/Gbp5/H2-D1/H2-L/B2m/Socs1/Ciita/H2-M2/Irf9/Trim30a/H2-Aa/Trim12c/Stat1/H2-Eb1/H2-T22/H2-T9/H2-Q1/Ptafr/Icam1/Ifi30/Ifng/Oas3/Irf8/Trim21/ Gbp2b                                                                                                                                                        |
| 3   | Interferon Signaling                | 9.7E-21 | Gbp2/H2-K1/H2-Ab1/H2-T23/Irf1/Irf4/Gbp5/H2-D1/H2-L/Uba7/B2m/Socs1/Ciita/H2-M2/Irf9/Trim30a/H2-Aa/Trim12c/Stat1/H2-Eb1/H2-T22/H2-T9/H2-Q1/Ptafr/Icam1/Ifi30/Ifng/Ube2l6/Oas3/Irf8/Isg15/ Trim21/Gbp2b                                                                                                                                      |
| 13  | Chemokine receptors bind chemokines | 2.1E-09 | Cxcl10/Cxcl13/Cxcl11/Ccr2/Ccl5/Cxcr6/Cxcr3/Cxcl16/Ccr9/Cxcr4/Xcr1/Ccr5/Ccr7/Ccl22                                                                                                                                                                                                                                                         |

388

389 **Supplemental Table 3. Oligonucleotide primers used for mRNA real-time PCR**

| Gene           | Sense primer (5' to 3') | Antisense primer (5' to 3') |
|----------------|-------------------------|-----------------------------|
| <i>mCcl8</i>   | GTAGACCCACACAGAAGTGG    | GGAGAACTTCCAGCTTTGGC        |
| <i>mCxcr3</i>  | ATGGGGTCTCTGTCTGCTCT    | TGAGGCGCTGATCGTAGTTG        |
| <i>mCcl3</i>   | CAGCGAGTACCAGTCCCTTT    | GCAGTGGTGGAGACCTTCAT        |
| <i>mCcl28</i>  | AGTGGGTCAGGCGGGAATG     | GAGGTTTGAAAAGCCACACACA      |
| <i>mCxcl9</i>  | GGGACCACAGACTATTCCCC    | GCCAATGCCTGGTGTGTAAC        |
| <i>mCxcl10</i> | TGAGAGACATCCCCGAGCCAA   | GAGGCAGAAAATGACGGCAG        |
| <i>mCer1</i>   | TTGTCCATGCTGTGTTTGCC    | GGCAGGCATGGAAGCTAAGA        |
| <i>mCer2</i>   | GCCATCATAAAGGAGCCATAACC | TGTGGTGAATCCAATGCCCT        |
| <i>mCer8</i>   | ATCCGACCTGCTCTTTGTCC    | GGCCAGAGACCACCTTACAC        |
| <i>mIfng</i>   | TGAATGTCCAACGCAAAGCA    | CTGTTTTAGCTGCTGGCGAC        |
| <i>mIfitm3</i> | CCCCTTACCCCTTCATTCCTT   | GCCGTAGGACATTGGGAGTA        |
| <i>mGapdh</i>  | CCAGCTACTCGCGGCTTTA     | GTTACACCGACCTTCACCA         |
| <i>hIFNG</i>   | GAAAGTTGGGGGAGTGTGCT    | GGGTCTCATCTAATGGGCCG        |
| <i>hIFITM3</i> | TGCTGATCTTCCAGGCCTAT    | AGCGTGTGAGGATAAAGGGC        |
| <i>hCCL8</i>   | TCCCAGGATCTGGTGCTTACT   | AACCTCTCTGCTCCTCGGTG        |
| <i>hGAPDH</i>  | CCGCATCTTCTTTTGCCTCG    | ATCCGTTGACTCCGACCTTC        |

390

391 **Supplemental Table 4. Key resources table**

| Reagent or resource                                                      | Source                    | Identifier      |
|--------------------------------------------------------------------------|---------------------------|-----------------|
| <b>Antibodies</b>                                                        |                           |                 |
| Anti-beta-actin (HRP-conjugate)                                          | Abcam                     | Cat# ab20272    |
| Anti-PSD-95                                                              | Abcam                     | Cat# ab2723     |
| Anti-PSD-95                                                              | Proteintech               | Cat# 20665-1-AP |
| Anti-Synaptophysin                                                       | Proteintech               | Cat# 17785-1-AP |
| Anti-Synaptophysin                                                       | Synaptic Systems          | Cat# 101 002    |
| Anti-CD68                                                                | Bio-Rad                   | Cat# AB_322219  |
| Anti-CD68                                                                | Proteintech               | Cat# 66231-2-Ig |
| Anti-IBA-1                                                               | Wako                      | Cat# 019-19741  |
| Anti-TMEM119                                                             | Abcam                     | Cat# ab209064   |
| Anti-JAK1                                                                | Cell Signaling Technology | Cat# 3332       |
| Anti-p-JAK1                                                              | Cell Signaling Technology | Cat# 3331       |
| Anti-JAK2                                                                | Cell Signaling Technology | Cat# 3230       |
| Anti-p-JAK2                                                              | Cell Signaling Technology | Cat# 3771       |
| Anti-STAT1                                                               | Cell Signaling Technology | Cat# 9172       |
| Anti-p-STAT1                                                             | Cell Signaling Technology | Cat# 9167       |
| Horseradish peroxidase-conjugated goat anti-mouse IgG secondary antibody | Thermo Fisher Scientific  | Cat# 31430      |
| Horseradish peroxidase-conjugated goat rabbit IgG secondary antibody     | Thermo Fisher Scientific  | Cat# 31460      |
| Alexa Fluor 555 goat anti-mouse IgG                                      | Invitrogen                | Cat# A 21422    |
| Alexa Fluor 555 goat anti-rabbit IgG                                     | Invitrogen                | Cat# A21429     |
| Alexa Fluor 555 donkey anti-goat IgG                                     | Invitrogen                | Cat# A21432     |
| Alexa Fluor 488 goat anti-rabbit IgG                                     | Invitrogen                | Cat# A11008     |
| Alexa Fluor 488 donkey anti-mouse IgG                                    | Invitrogen                | Cat# A21202     |
| APC anti-mouse CD3e                                                      | BD Biosciences            | Cat# 561826     |
| FITC anti-mouse CD4                                                      | BD Biosciences            | Cat# 561828     |
| BV510 anti-mouse CD8 $\alpha$                                            | BD Biosciences            | Cat# 563068     |
| BV786 anti-mouse IFN- $\gamma$                                           | BD Biosciences            | Cat# 563773     |
| BV605 anti-human CD3                                                     | BD Biosciences            | Cat# 564712     |
| FITC anti-human CD4                                                      | BD Biosciences            | Cat# 550628     |
| PerCP-Cy5.5 anti-human CD8                                               | Biolegend                 | Cat# 344710     |
| ACP anti-human IFN- $\gamma$                                             | BD Biosciences            | Cat# 562017     |
| <b>Chemicals, peptides, and recombinant proteins</b>                     |                           |                 |
| ProLong Gold Antifade Mountant                                           | Invitrogen                | Cat# P36930     |
| PLX5622                                                                  | Med Chem Express          | Cat# HY-114153  |
| Pristane                                                                 | Sigma-Aldrich             | Cat# P2870      |
| Mineral oil                                                              | Sigma-Aldrich             | Cat# M5904      |
| Human T-Activator CD3/CD28                                               | eBioscience               | Cat# 11161D     |

|                                                            |                                                    |                                                                                                                       |
|------------------------------------------------------------|----------------------------------------------------|-----------------------------------------------------------------------------------------------------------------------|
| Ruxolitinib                                                | Selleck                                            | Cat# S1378                                                                                                            |
| Fludarabine                                                | Selleck                                            | Cat# S1491                                                                                                            |
| Recombinant mouse CCL8 protein                             | BioLegend                                          | Cat# 581704                                                                                                           |
| Mouse IFN- $\gamma$ protein                                | R&D Systems                                        | Cat# 485-MI                                                                                                           |
| IFN- $\gamma$ blocking antibody                            | R&D Systems                                        | Cat# MAB10262                                                                                                         |
| Rat IgG2b isotype control                                  | R&D Systems                                        | Cat# 141945                                                                                                           |
| DNase I                                                    | Sigma-Aldrich                                      | Cat# D5025-15KU                                                                                                       |
| Collagenase type IV                                        | Sigma-Aldrich                                      | Cat# 11088858001                                                                                                      |
| <b>Experimental models:</b>                                |                                                    |                                                                                                                       |
| Mouse: MRL/MpJ- <i>Fas</i> <sup>pr</sup>                   | Shanghai Lingchang Biotechnology Corporation       | The Jackson Laboratory: stock #006825                                                                                 |
| Mouse: MRL/MpJ                                             | Shanghai Lingchang Biotechnology Corporation       | The Jackson Laboratory: stock # 000486                                                                                |
| Mouse: <i>Syn1</i> <sup>Cre</sup>                          | Slac Laboratory Animal Center                      | The Jackson Laboratory: stock # 003966                                                                                |
| Mouse: <i>Ccl8</i> <sup>flxed</sup>                        | Cyagen Biosciences                                 | stock # CKOCMP-01361-Ccl8                                                                                             |
| Mouse: C57BL/6J                                            | Model Animal Research Center of Nanjing University | N/A                                                                                                                   |
| <b>Software and algorithms</b>                             |                                                    |                                                                                                                       |
| Prism 6 Software                                           | GraphPad                                           | <a href="https://www.graphpad.com/scientific-software/prism/">https://www.graphpad.com/scientific-software/prism/</a> |
| ImageJ Software                                            | NIH                                                | <a href="https://imagej.nih.gov/ij/">https://imagej.nih.gov/ij/</a>                                                   |
| Imaris 8.3.1                                               | Bitplane                                           | <a href="http://www.bitplane.com/imaris">http://www.bitplane.com/imaris</a>                                           |
| TopScan Software                                           | CleverSys                                          | <a href="http://cleversysinc.com/products/software/topscan/">http://cleversysinc.com/products/software/topscan/</a>   |
| FlowJo software V10                                        | Tree Star                                          |                                                                                                                       |
| <b>Other</b>                                               |                                                    |                                                                                                                       |
| FD Rapid GolgiStain Kit                                    | FD Neurotechnologies                               | Cat# PK401                                                                                                            |
| HiScript III RT SuperMix for qPCR Kit                      | Vazyme                                             | Cat# R323-01                                                                                                          |
| ChamQ SYBR qPCR Master Mix                                 | Vazyme                                             | Cat# Q341-02                                                                                                          |
| CD11b (Microglia) MicroBeads                               | Miltenyibiotec                                     | Cat# 130-093-636                                                                                                      |
| Bradford Protein Detection Kit                             | Keygen                                             | Cat# KGA801-804                                                                                                       |
| Percoll                                                    | GE Healthcare                                      | Cat# 17-0891-09                                                                                                       |
| EasySep™ Human CD4 <sup>+</sup> T-Cell Isolation Kit       | STEMCELL                                           | Cat# 17952                                                                                                            |
| EasySep™ Human Naive CD4 <sup>+</sup> T-Cell Isolation Kit | STEMCELL                                           | Cat# 19555                                                                                                            |
| EasySep™ Mouse CD4 <sup>+</sup> T-Cell Isolation Kit       | STEMCELL                                           | Cat# 19852                                                                                                            |
| Mouse anti-dsDNA ELISA Kit                                 | FUJIFILM                                           | Cat# 631-02699                                                                                                        |
| Mouse anti-CCL8 ELISA Kit                                  | Abcam                                              | Cat# ab203366                                                                                                         |
| Human anti-IFN- $\gamma$ ELISA Kit                         | FCMRCS                                             | Cat# FMS-ELH035                                                                                                       |
| Human anti-CCL8 ELISA Kit                                  | Abcam                                              | Cat# ab223856                                                                                                         |
| RNA FISH staining Kit                                      | GenePharma                                         | Cat# F22201                                                                                                           |

393 **Supplemental Table 5. Patient data for all samples used in this study**

394 Serum and PBMC samples

| Internal Reference | Age (year)     | Sex          | SLEDAI | Clinical manifestations |
|--------------------|----------------|--------------|--------|-------------------------|
| Control Group      |                |              |        |                         |
| <i>n</i> = 11      | 36.8 (Average) | M (3), F (8) | -      | -                       |
| SLE Group          |                |              |        |                         |
| SLE 1              | 40             | F            | 13     | C                       |
| SLE 2              | 47             | M            | 22     | C, V                    |
| SLE 3              | 43             | M            | 8      | C                       |
| SLE 4              | 30             | M            | 20     | C, V                    |
| SLE 5              | 28             | F            | 24     | LN, C                   |
| SLE 6              | 32             | F            | 20     | LN, C                   |
| SLE 7              | 28             | F            | 20     | LN, C                   |
| SLE 8              | 28             | F            | 18     | LN, C                   |
| SLE 9              | 43             | F            | 15     | A, C                    |
| SLE 10             | 52             | F            | 8      | C, LN                   |
| SLE 11             | 30             | F            | 26     | LN, C, A                |
| SLE 12             | 58             | F            | 16     | LN                      |
| SLE 13             | 34             | F            | 11     | C                       |
| SLE 14             | 33             | F            | 10     | C                       |
| SLE 15             | 23             | F            | 20     | C                       |

395 A, Arthritis; C, Cytopenia; F, Febrile; LN, Lupus nephritis; NP, Neuropsychiatric; V, Vasculitis.

## 396 CSF samples

| Internal Reference | Age (year)     | Sex          | SLEDAI | Clinical manifestations |
|--------------------|----------------|--------------|--------|-------------------------|
| Control Group      |                |              |        |                         |
| <i>n</i> = 6       | 30.7 (Average) | M (2), F (4) | -      | -                       |
| Non-NPSLE Group    |                |              |        |                         |
| non-NPSLE 1        | 18             | F            | 2      | F                       |
| non-NPSLE 2        | 42             | M            | 5      | LN                      |
| non-NPSLE 3        | 15             | F            | 13     | F, C                    |
| non-NPSLE 4        | 48             | F            | 17     | LN                      |
| non-NPSLE 5        | 26             | F            | 8      | A                       |
| non-NPSLE 6        | 63             | F            | 10     | A, C, LN                |
| non-NPSLE 7        | 53             | F            | 7      | LN                      |
| non-NPSLE 8        | 13             | M            | 2      | F                       |
| non-NPSLE 9        | 32             | F            | 8      | F, C                    |
| NPSLE Group        |                |              |        |                         |
| NPSLE 1            | 30             | F            | 24     | F, C, NP                |
| NPSLE 2            | 42             | F            | 23     | A, NP                   |
| NPSLE 3            | 40             | F            | 16     | A, C, V, NP             |
| NPSLE 4            | 43             | F            | 12     | A, C, NP                |
| NPSLE 5            | 22             | F            | 27     | F, C, LN, NP            |
| NPSLE 6            | 14             | F            | 8      | F, NP                   |
| NPSLE 7            | 57             | M            | 12     | C, LN, NP               |
| NPSLE 8            | 48             | F            | 20     | A, C, LN, NP            |
| NPSLE 9            | 54             | F            | 26     | A, C, NP                |
| NPSLE 10           | 27             | F            | 18     | A, C, NP                |
| NPSLE 11           | 31             | M            | 12     | F, C, NP                |
| NPSLE 12           | 34             | F            | 16     | NP                      |
| NPSLE 13           | 16             | F            | 14     | F, NP                   |
| NPSLE 14           | 56             | F            | 4      | F, NP                   |

397 A, Arthritis; C, Cytopenia; F, Febrile; LN, Lupus nephritis; NP, Neuropsychiatric; V, Vasculitis.

398 **Supplemental Table 6. O-link data**

| Panel              | Assay          | UniProt ID | OlinkID  | Missing Data freq. |
|--------------------|----------------|------------|----------|--------------------|
| Olink INFLAMMATION | IL8            | P10145     | OID00471 | 0%                 |
|                    | VEGFA          | P15692     | OID00472 | 0%                 |
|                    | CD8A           | P01732     | OID05124 | 0%                 |
|                    | CDCP1          | Q9H5V8     | OID00476 | 0%                 |
|                    | IL7            | P13232     | OID00478 | 0%                 |
|                    | OPG            | O00300     | OID00479 | 0%                 |
|                    | LAP TGF-beta-1 | P01137     | OID00480 | 0%                 |
|                    | uPA            | P00749     | OID00481 | 0%                 |
|                    | IL6            | P05231     | OID00482 | 0%                 |
|                    | MCP-1          | P13500     | OID00484 | 0%                 |
|                    | CXCL11         | O14625     | OID00486 | 0%                 |
|                    | TRAIL          | P50591     | OID00488 | 0%                 |
|                    | CXCL9          | Q07325     | OID00490 | 0%                 |
|                    | CST5           | P28325     | OID00491 | 0%                 |
|                    | OSM            | P13725     | OID00494 | 0%                 |
|                    | CXCL1          | P09341     | OID00496 | 0%                 |
|                    | CCL4           | P13236     | OID00498 | 0%                 |
|                    | CD6            | P30203     | OID00499 | 0%                 |
|                    | SCF            | P21583     | OID00500 | 0%                 |
|                    | IL18           | Q14116     | OID00501 | 0%                 |
|                    | TGF-alpha      | P01135     | OID00503 | 0%                 |
|                    | MCP-4          | Q99616     | OID00504 | 0%                 |
|                    | CCL11          | P51671     | OID00505 | 0%                 |
|                    | TNFSF14        | O43557     | OID00506 | 0%                 |
|                    | FGF-5          | P12034     | OID00509 | 0%                 |
|                    | MMP-1          | P03956     | OID00510 | 0%                 |
|                    | LIF-R          | P42702     | OID00511 | 0%                 |
|                    | CCL19          | Q99731     | OID00513 | 0%                 |
|                    | IL-10RB        | Q08334     | OID00515 | 0%                 |
|                    | IL-18R1        | Q13478     | OID00517 | 0%                 |
|                    | PD-L1          | Q9NZQ7     | OID00518 | 0%                 |
|                    | CXCL5          | P42830     | OID00520 | 0%                 |
|                    | HGF            | P14210     | OID00522 | 0%                 |
|                    | IL-12B         | P29460     | OID00523 | 0%                 |
|                    | MMP-10         | P09238     | OID00527 | 0%                 |
|                    | CCL23          | P55773     | OID00530 | 0%                 |
|                    | CD5            | P06127     | OID00531 | 0%                 |
|                    | CCL3           | P10147     | OID00532 | 0%                 |
|                    | Flt3L          | P49771     | OID00533 | 0%                 |
|                    | CXCL6          | P80162     | OID00534 | 3%                 |
|                    | CXCL10         | P02778     | OID00535 | 6%                 |
|                    | 4E-BP1         | Q13541     | OID00536 | 6%                 |
|                    | SIRT2          | Q8IXJ6     | OID00538 | 10%                |
|                    | CCL28          | Q9NRJ3     | OID00539 | 10%                |
|                    | IFN-gamma      | P01579     | OID05547 | 13%                |

|  |            |        |          |      |
|--|------------|--------|----------|------|
|  | DNER       | Q8NFT8 | OID01213 | 13%  |
|  | CD40       | P25942 | OID00542 | 13%  |
|  | FGF-19     | O95750 | OID00545 | 13%  |
|  | MCP-2      | P80075 | OID00549 | 16%  |
|  | CCL25      | O15444 | OID00551 | 16%  |
|  | CX3CL1     | P78423 | OID00552 | 19%  |
|  | TNFRSF9    | Q07011 | OID00553 | 23%  |
|  | TWEAK      | O43508 | OID00555 | 23%  |
|  | ADA        | P00813 | OID00560 | 26%  |
|  | TNFB       | P01374 | OID00561 | 32%  |
|  | CSF-1      | P09603 | OID00562 | 35%  |
|  | TNF        | P01375 | OID05548 | 39%  |
|  | IL10       | P22301 | OID00528 | 39%  |
|  | IL-24      | Q13007 | OID00524 | 42%  |
|  | IL13       | P35225 | OID00525 | 45%  |
|  | ARTN       | Q5T4W7 | OID00526 | 45%  |
|  | IL-15RA    | Q13261 | OID00514 | 55%  |
|  | TRANCE     | O14788 | OID00521 | 55%  |
|  | Beta-NGF   | P01138 | OID00519 | 58%  |
|  | IL-22 RA1  | Q8N6P7 | OID00516 | 65%  |
|  | AXIN1      | O15169 | OID00487 | 71%  |
|  | SLAMF1     | Q13291 | OID00502 | 77%  |
|  | FGF-21     | Q9NSA1 | OID00512 | 81%  |
|  | FGF-23     | Q9GZV9 | OID00507 | 81%  |
|  | IL-10RA    | Q13651 | OID00508 | 84%  |
|  | TSLP       | Q969D9 | OID00497 | 84%  |
|  | IL-20RA    | Q9UHF4 | OID00489 | 84%  |
|  | IL-2RB     | P14784 | OID00492 | 90%  |
|  | IL-1 alpha | P01583 | OID00493 | 90%  |
|  | IL2        | P60568 | OID00495 | 90%  |
|  | MCP-3      | P80098 | OID00474 | 90%  |
|  | GDNF       | P39905 | OID00475 | 94%  |
|  | CD244      | Q9BZW8 | OID00477 | 94%  |
|  | IL-17C     | Q9P0M4 | OID00483 | 94%  |
|  | IL-17A     | Q16552 | OID00485 | 94%  |
|  | IL-20      | Q9NYY1 | OID00537 | 94%  |
|  | EN-RAGE    | P80511 | OID00541 | 94%  |
|  | IL33       | O95760 | OID00543 | 100% |
|  | LIF        | P15018 | OID00547 | 100% |
|  | IL4        | P05112 | OID00546 | 100% |
|  | NT-3       | P20783 | OID00554 | 100% |
|  | CCL20      | P78556 | OID00556 | 100% |
|  | ST1A1      | P50225 | OID00557 | 100% |
|  | STAMBP     | O95630 | OID00558 | 100% |
|  | IL5        | P05113 | OID00559 | 100% |
|  | CASP-8     | Q14790 | OID00550 | 100% |
|  | NRTN       | Q99748 | OID00548 | 100% |
